# Supplementary material for: Multiple inputs ensure yeast cell size homeostasis during cell cycle progression
Source: eLife journal article supplement (doi:10.7554/elife.34025), 2018-07-04
Supplement: supp [file elife-34025-supp-v1.zip]

Archive with 14 entries (14 files):
- elife_poa_e34025_Supplementary_file_1.docx
- elife_poa_e34025_Supplementary_file_2.docx
- elife_poa_e34025_Figure_1_figure_supplement_6.pdf
- elife_poa_e34025_Figure_1_figure_supplement_5.pdf
- elife_poa_e34025_Figure_1_video_1.mp4
- elife_poa_e34025_Figure_1_figure_supplement_7.pdf
- elife_poa_e34025_Transparent_Reporting_File.docx
- elife_poa_e34025_Figure_1_figure_supplement_1.pdf
- elife_poa_e34025_Figure_1_figure_supplement_3.pdf
- elife_poa_e34025_Figure_1_figure_supplement_2.pdf
- elife_poa_e34025_Figure_1_figure_supplement_9.pdf
- elife_poa_e34025_Figure_3_figure_supplement_1.pdf
- elife_poa_e34025_Figure_1_figure_supplement_4.pdf
- elife_poa_e34025_Figure_1_figure_supplement_8.pdf
