# Supplementary figures and images for: Multiple inputs ensure yeast cell size homeostasis during cell cycle progression
Source: eLife journal article supplement (doi:10.7554/elife.34025), 2018-07-04

# Figure 1 - Figure Supplement 6

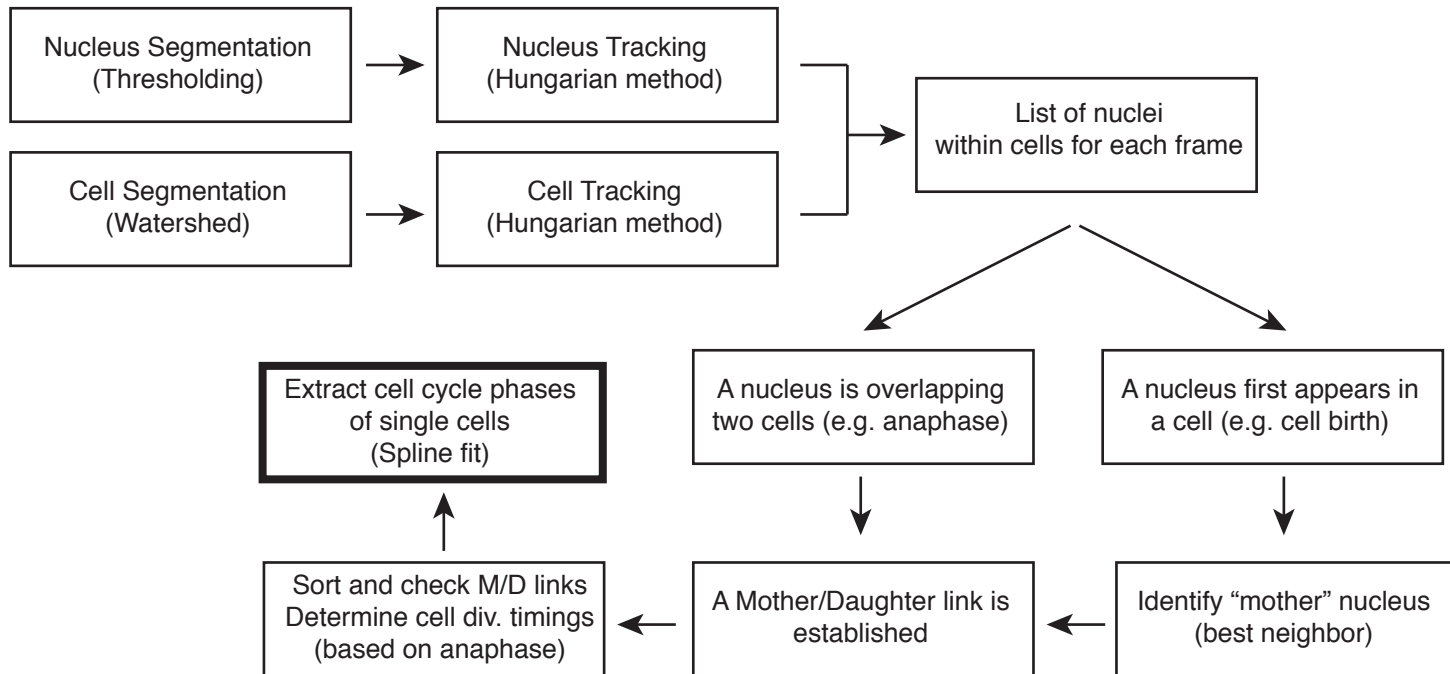

Supplement: supp [file elife-34025-supp-v1.zip › elife_poa_e34025_Figure_1_figure_supplement_6.pdf]

Figure 1 - Figure Supplement 5

**A**

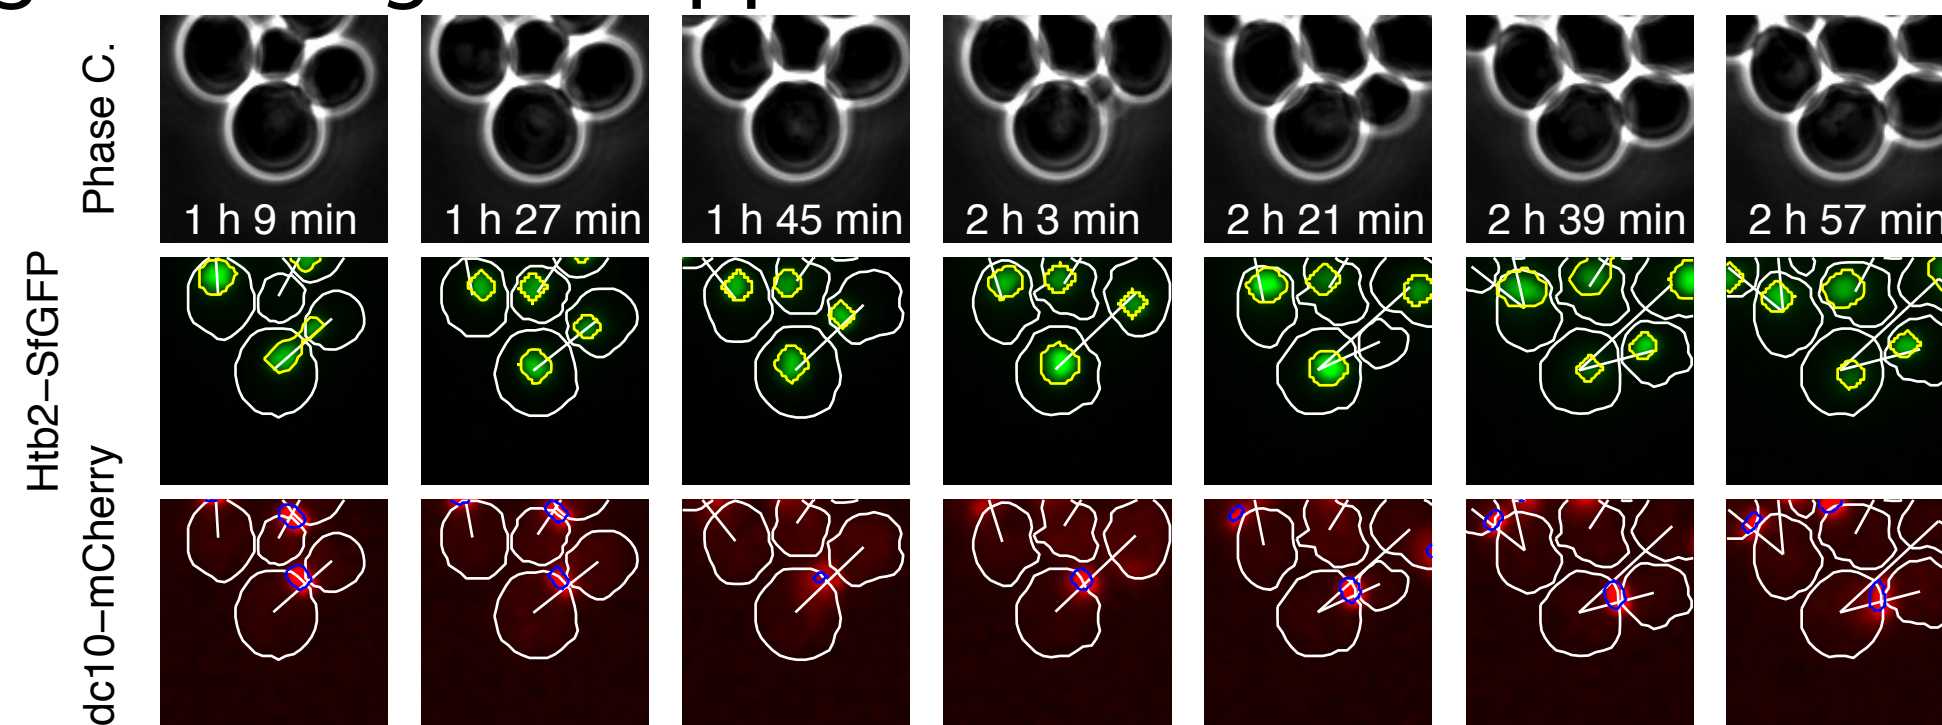

**B**

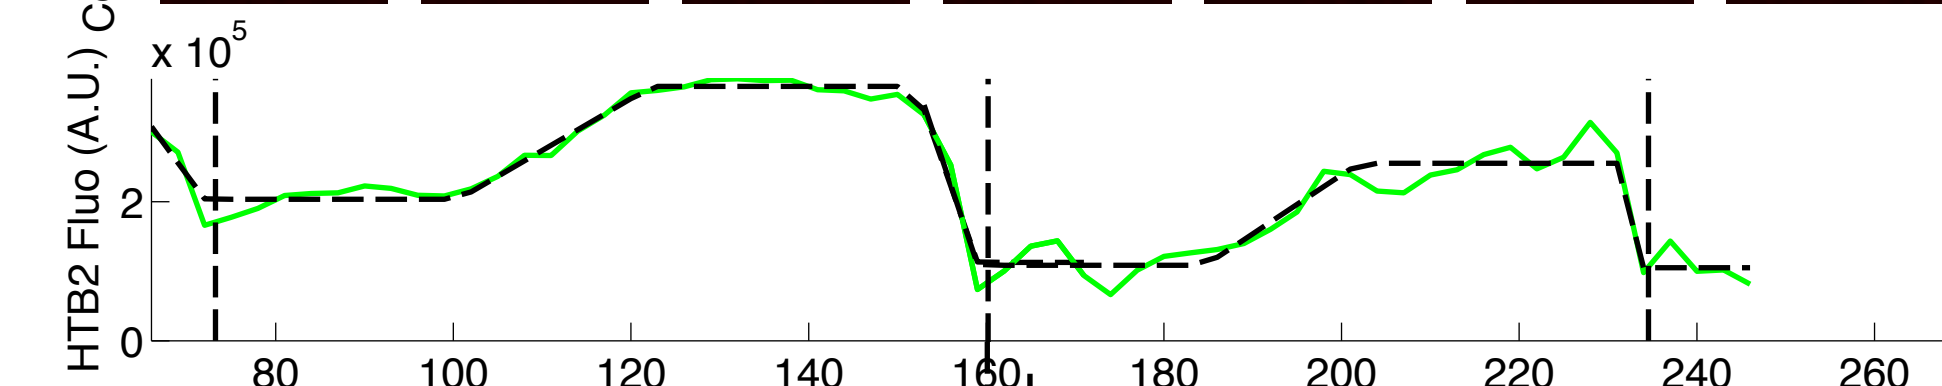

**C**

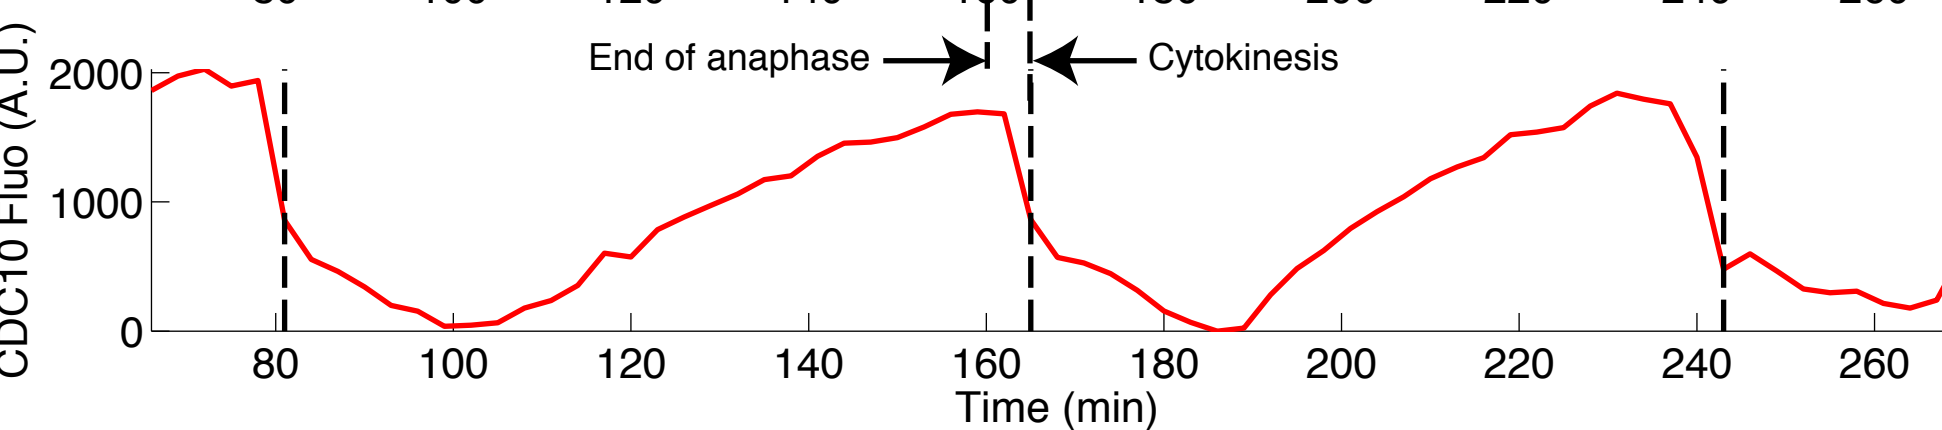

**D**

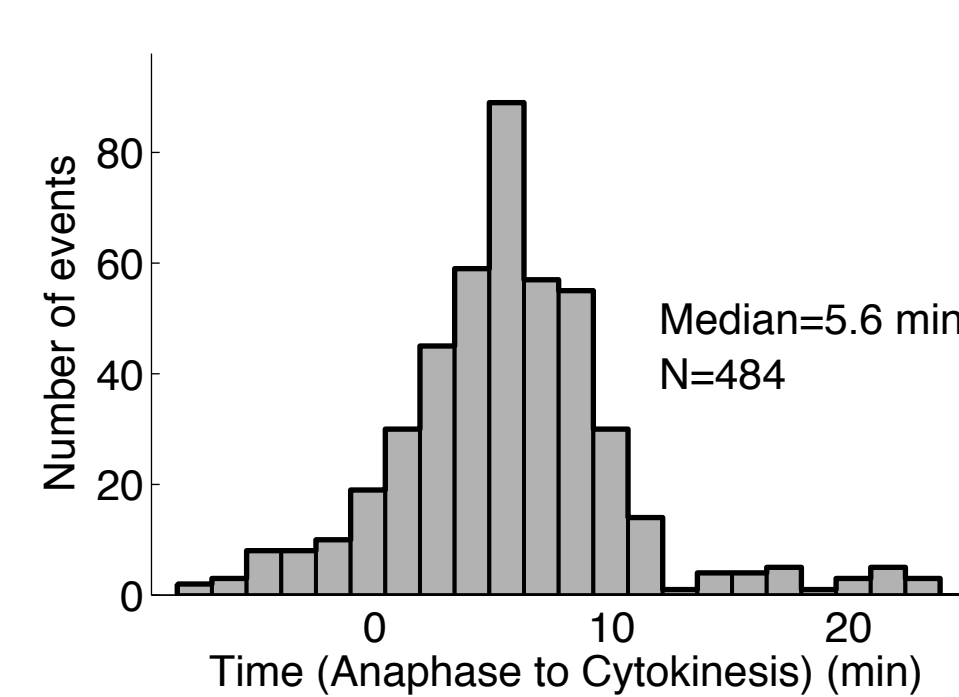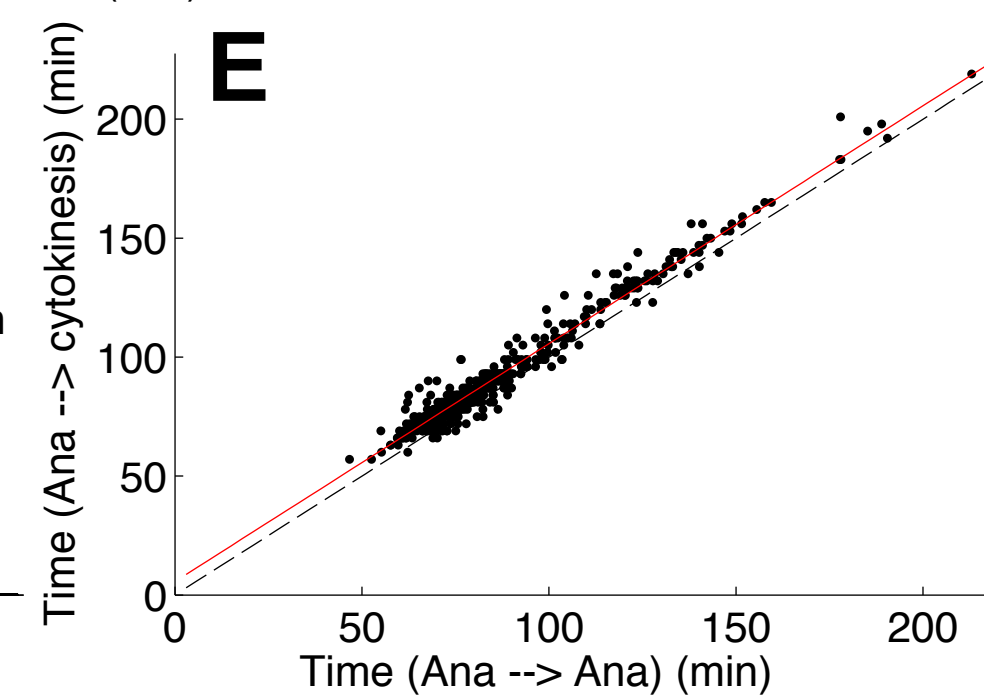

**F**

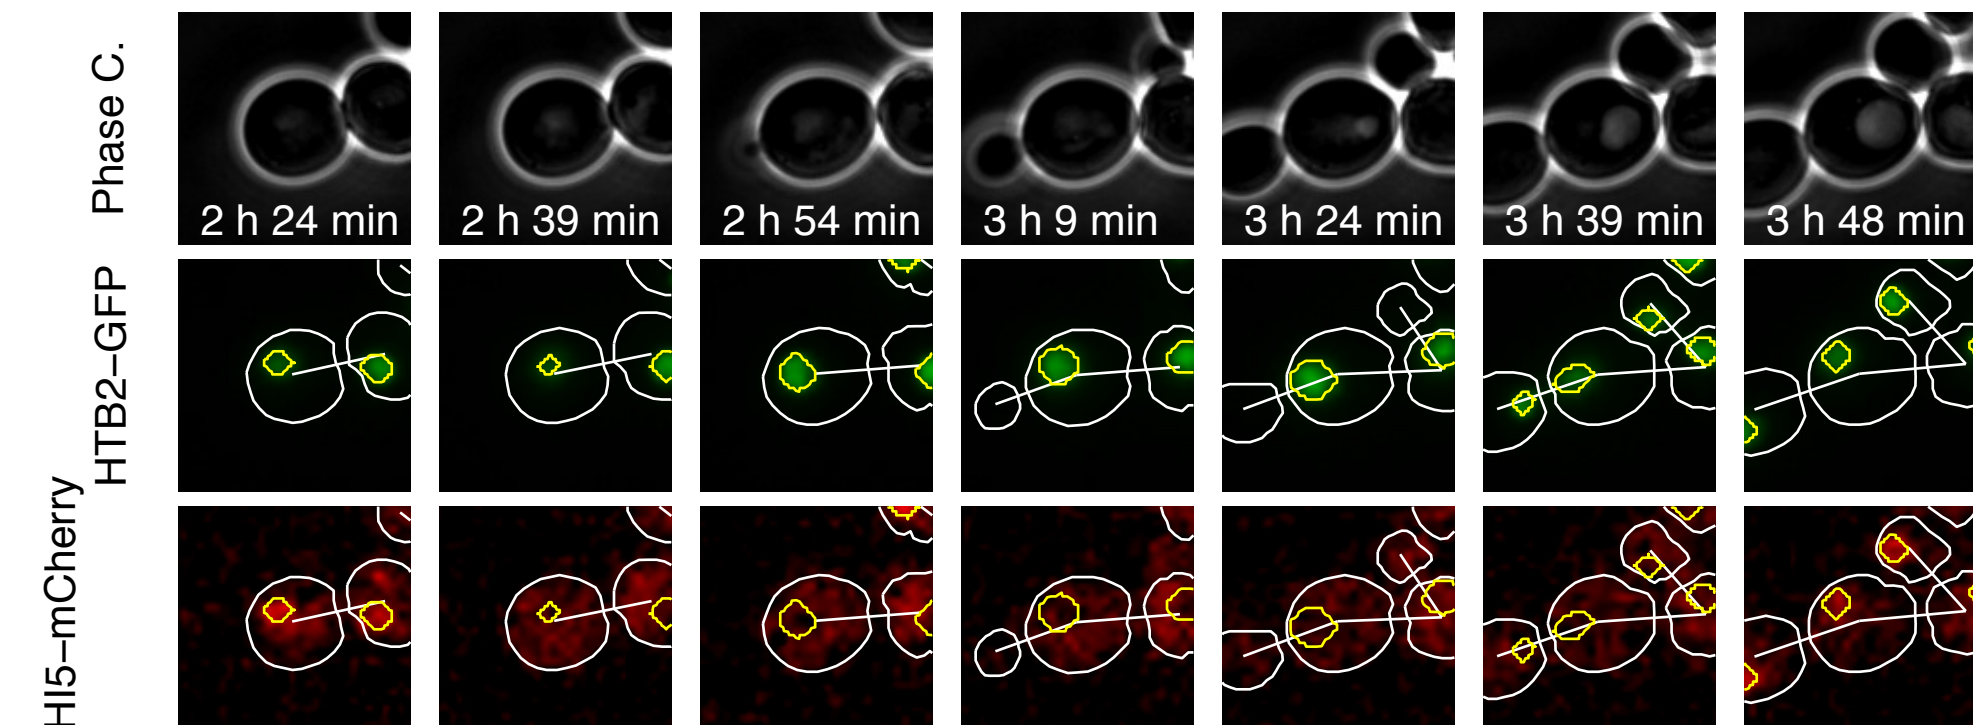

**G**

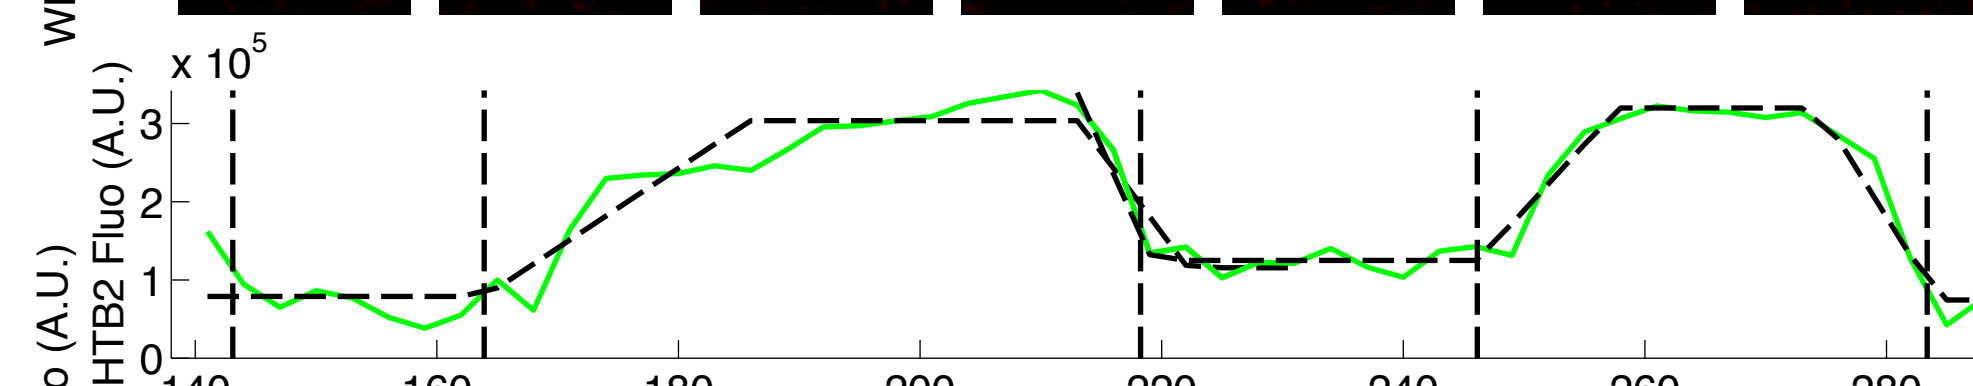

**H**

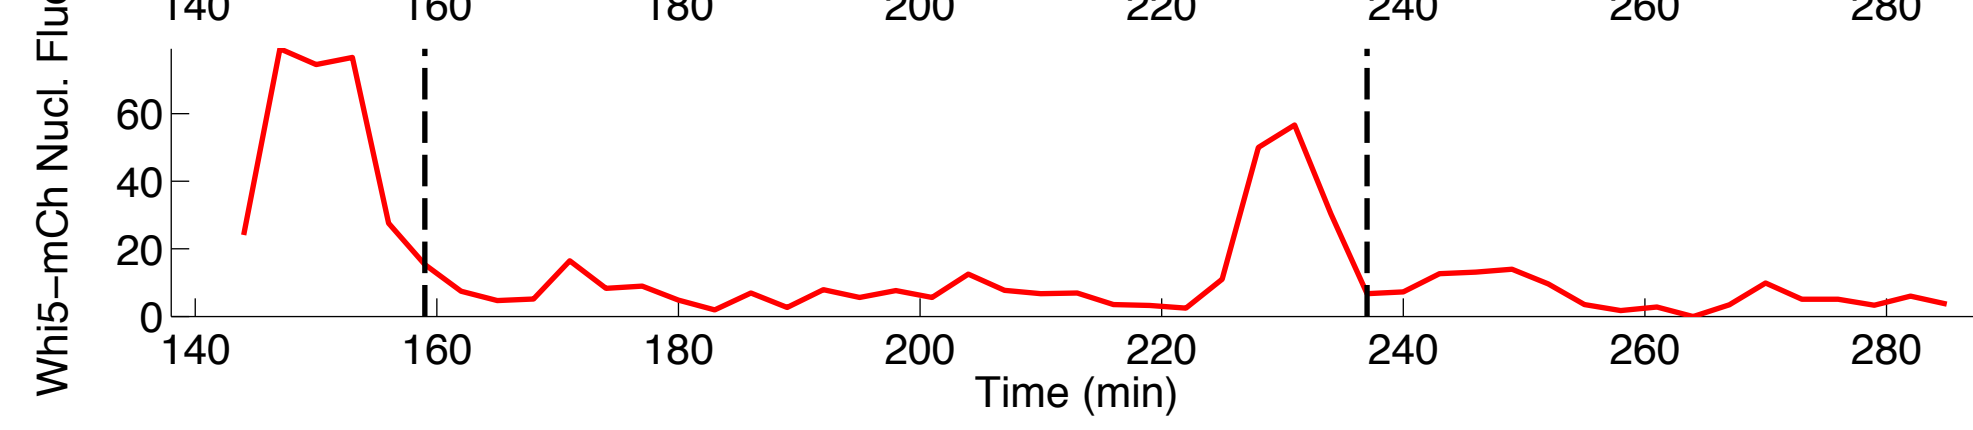

**I**

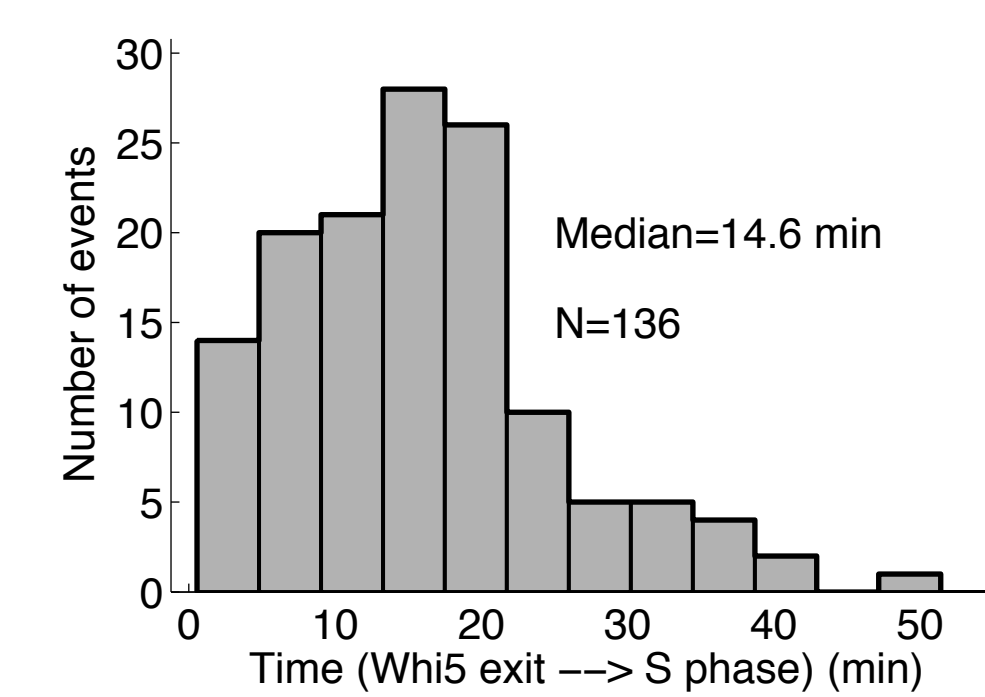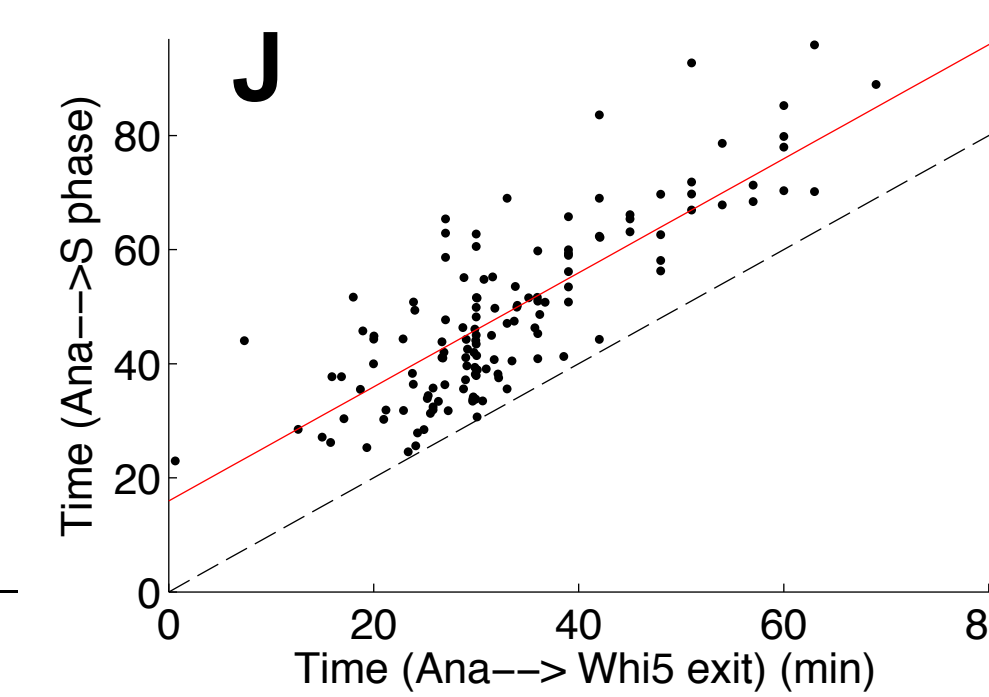

Supplement: supp [file elife-34025-supp-v1.zip › elife_poa_e34025_Figure_1_figure_supplement_5.pdf]

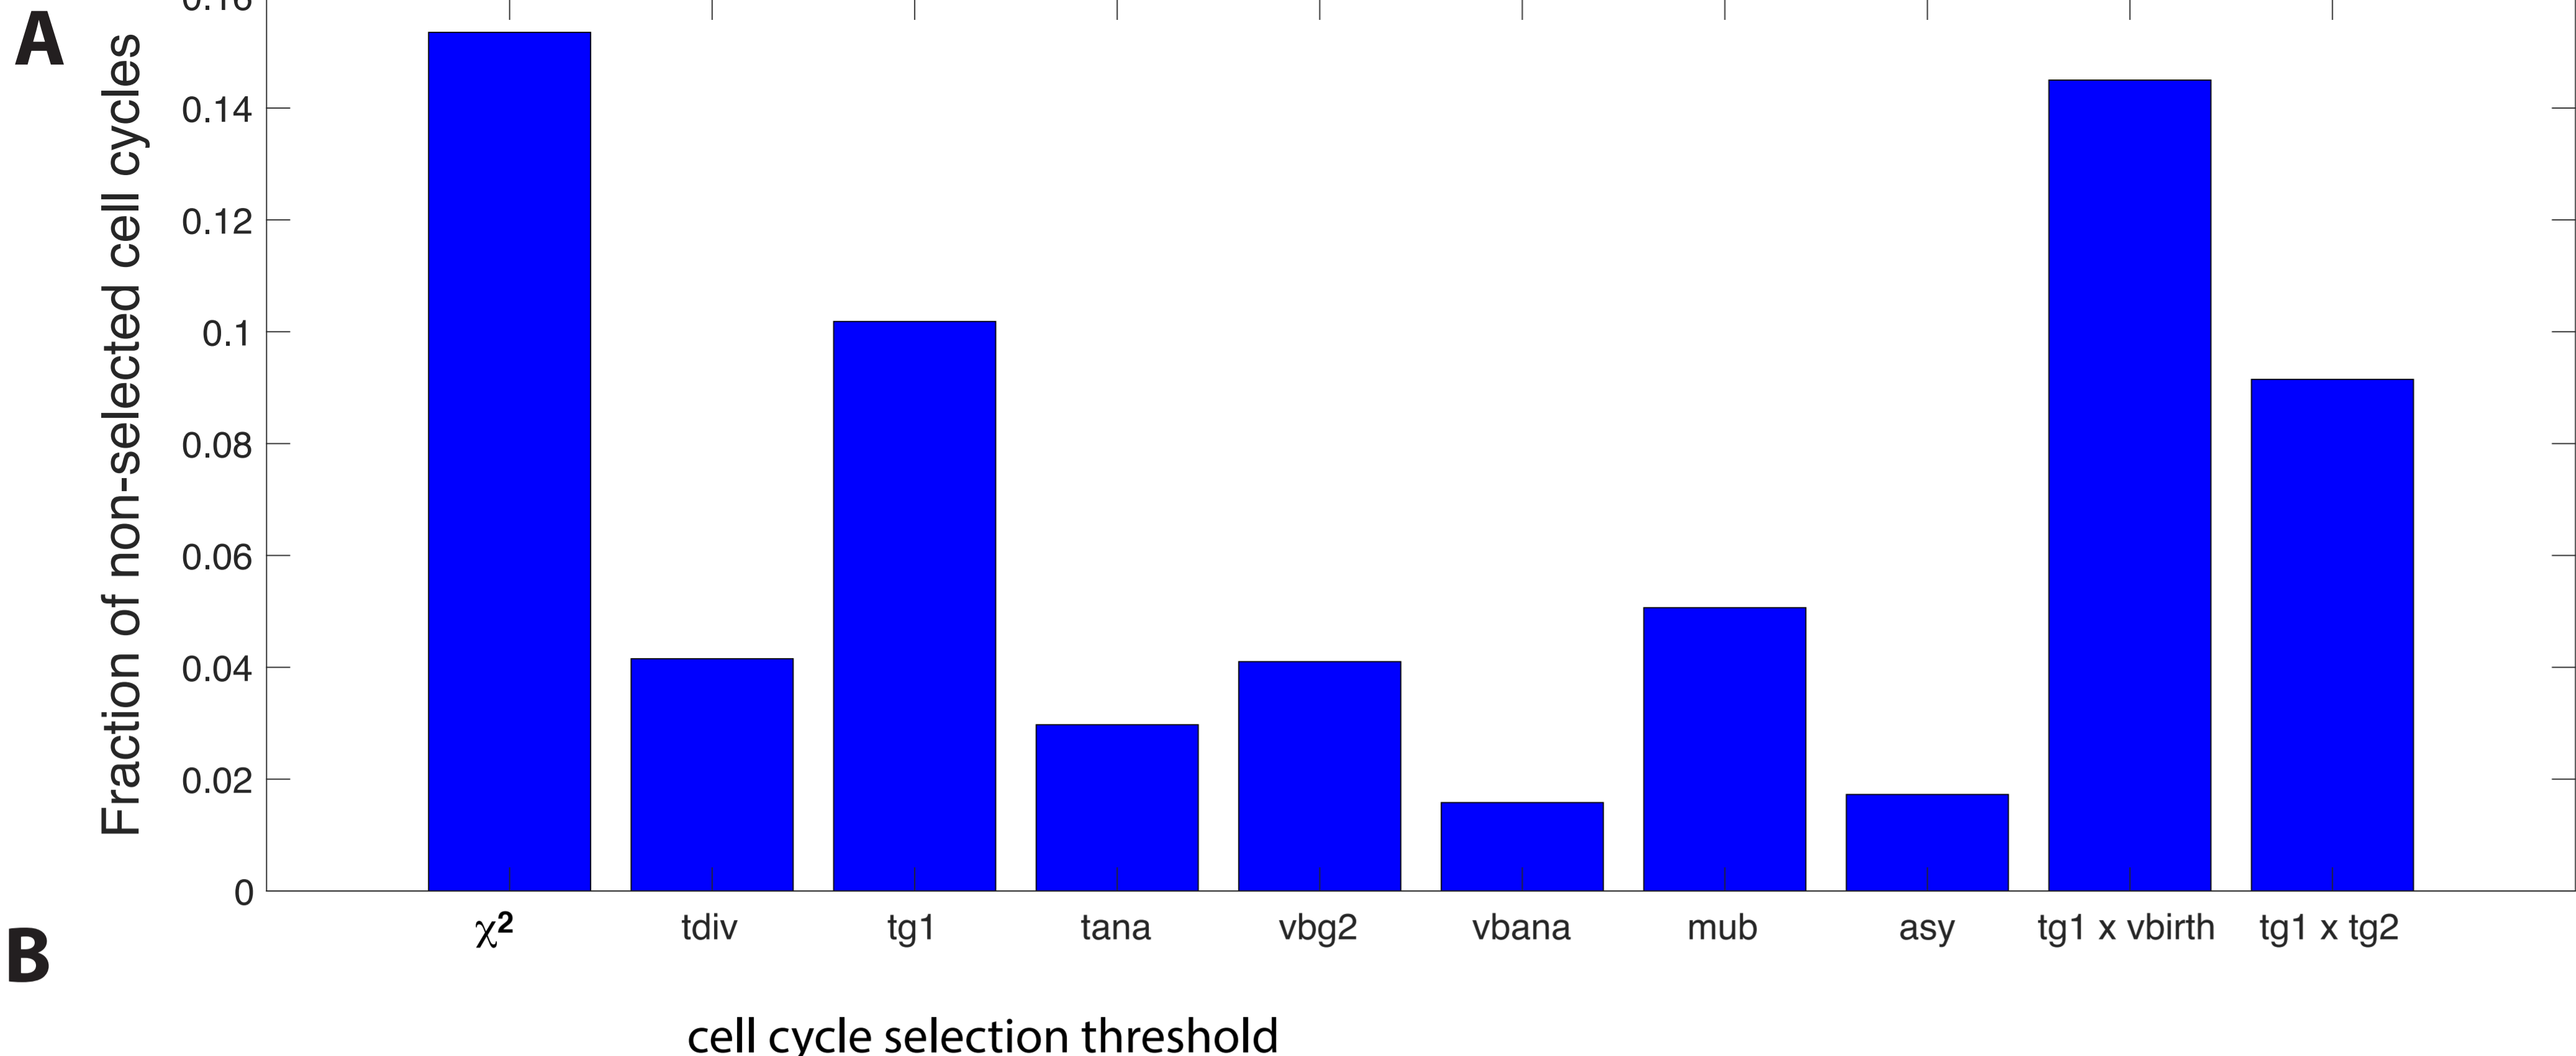

Figure 1 -  
Figure supplement 7

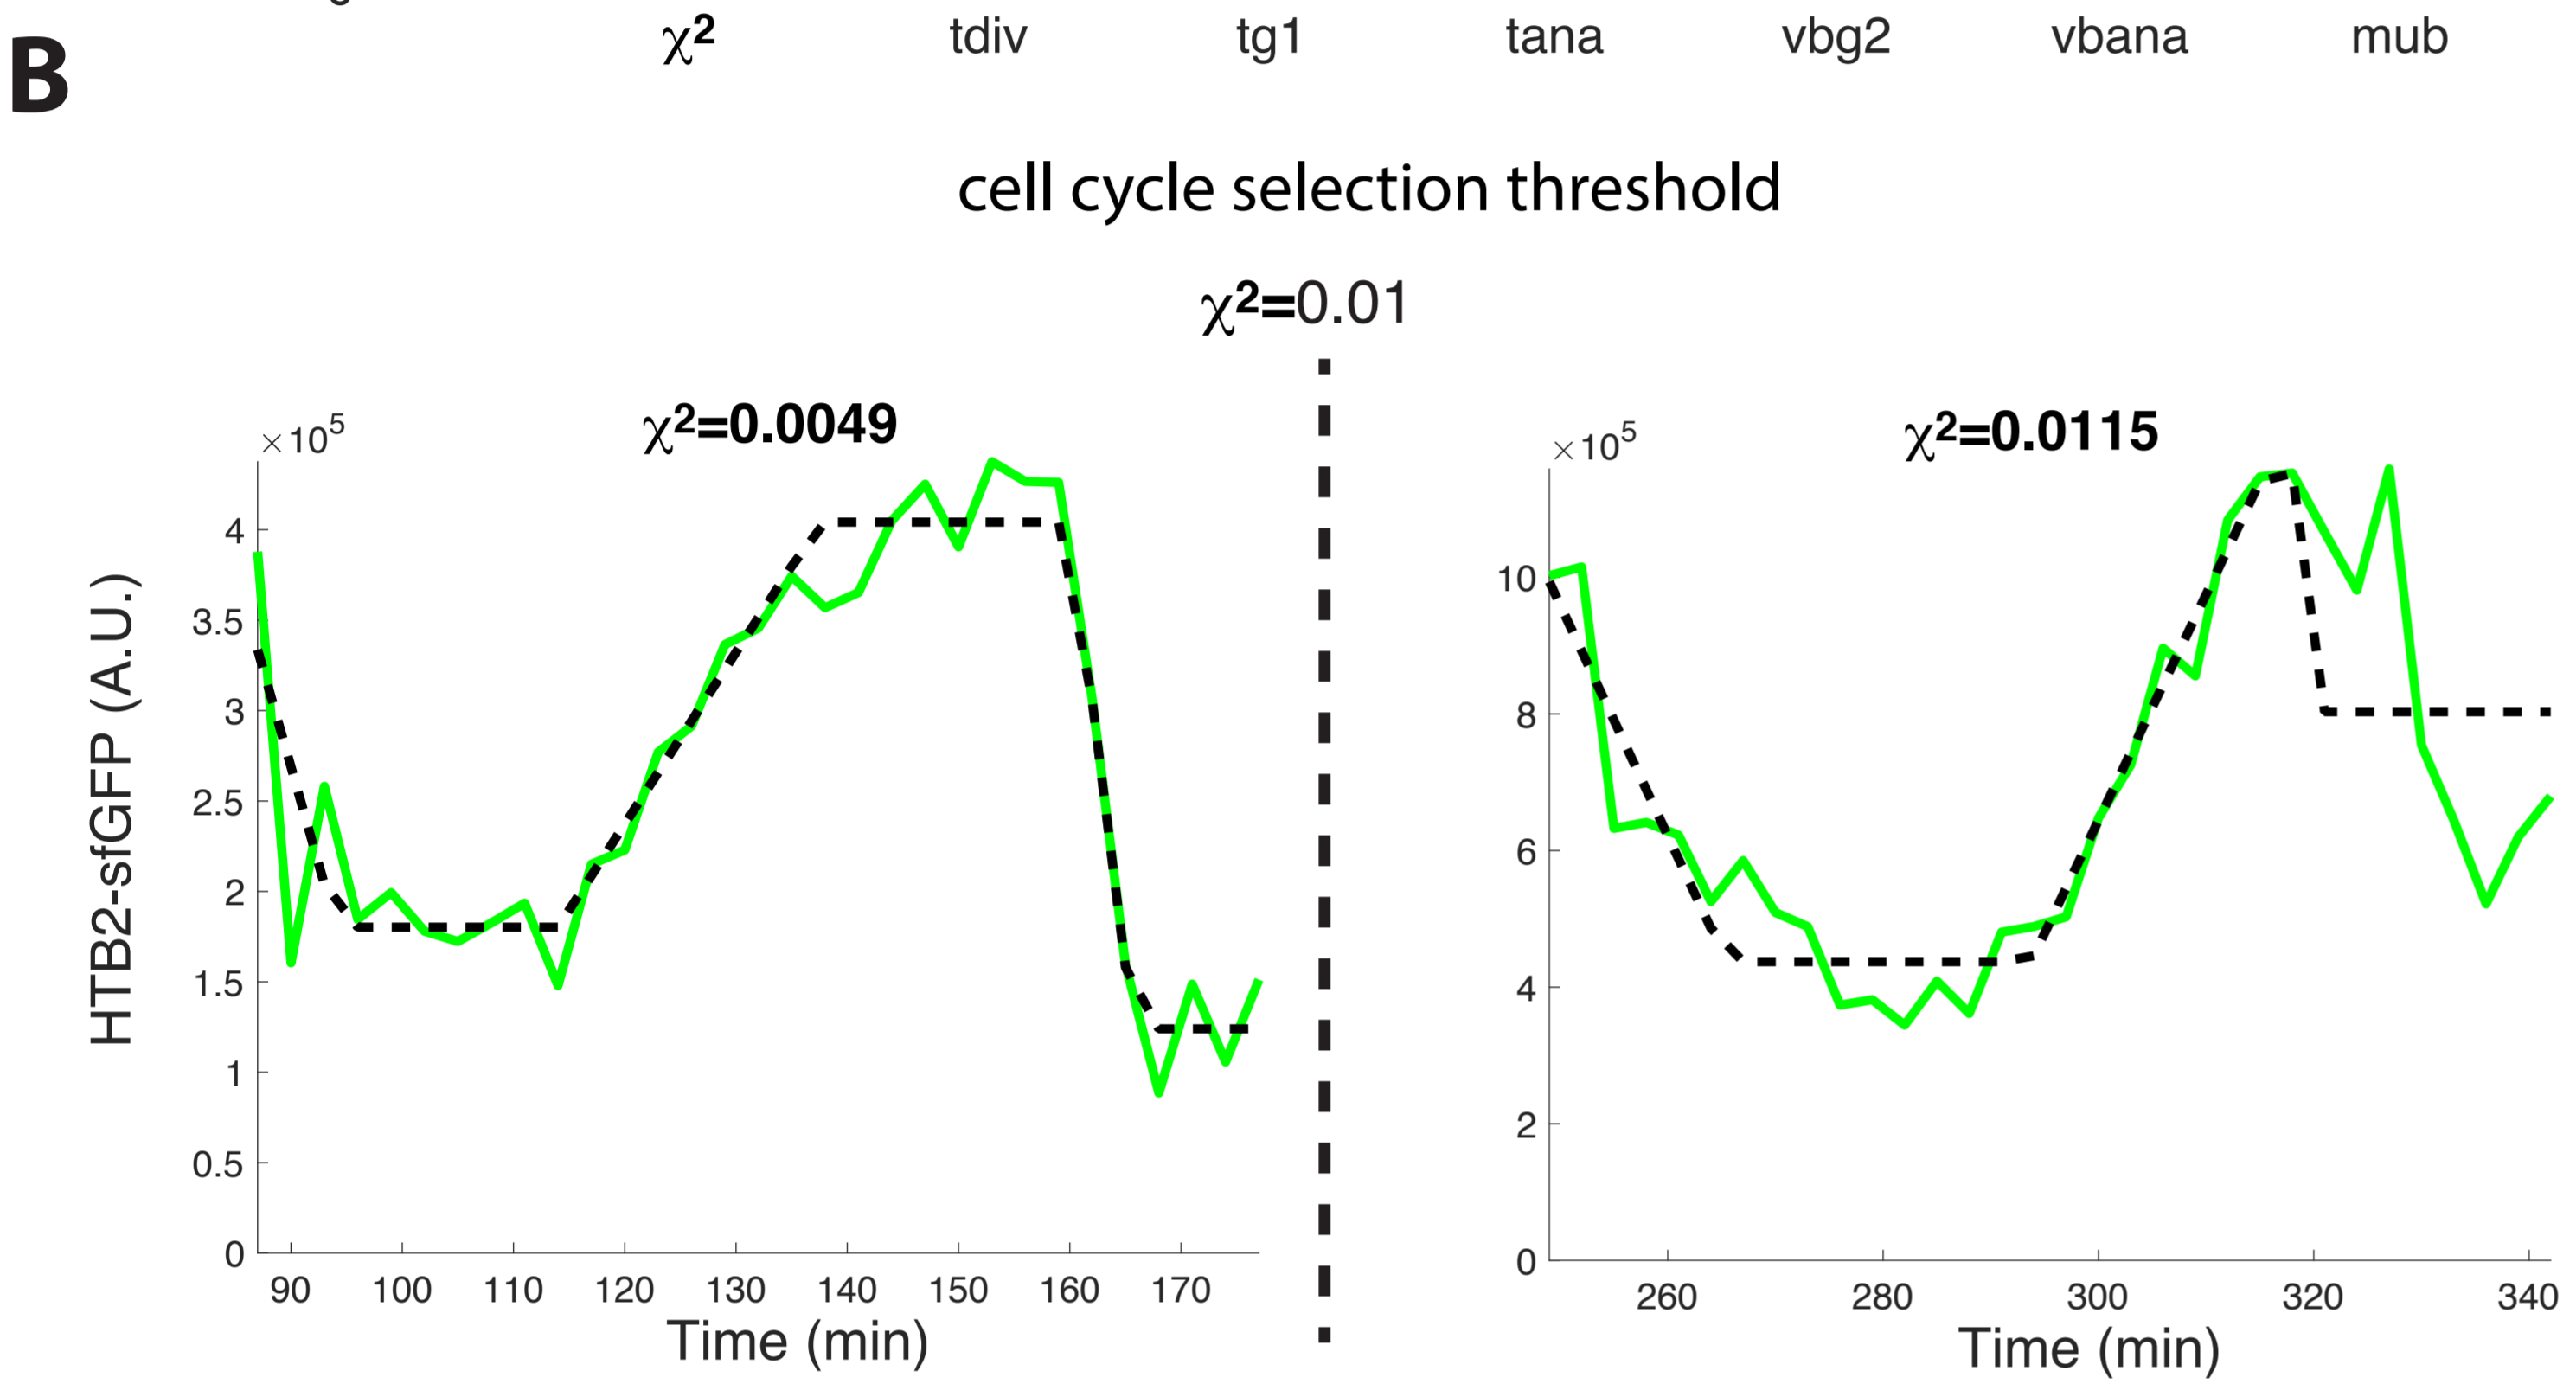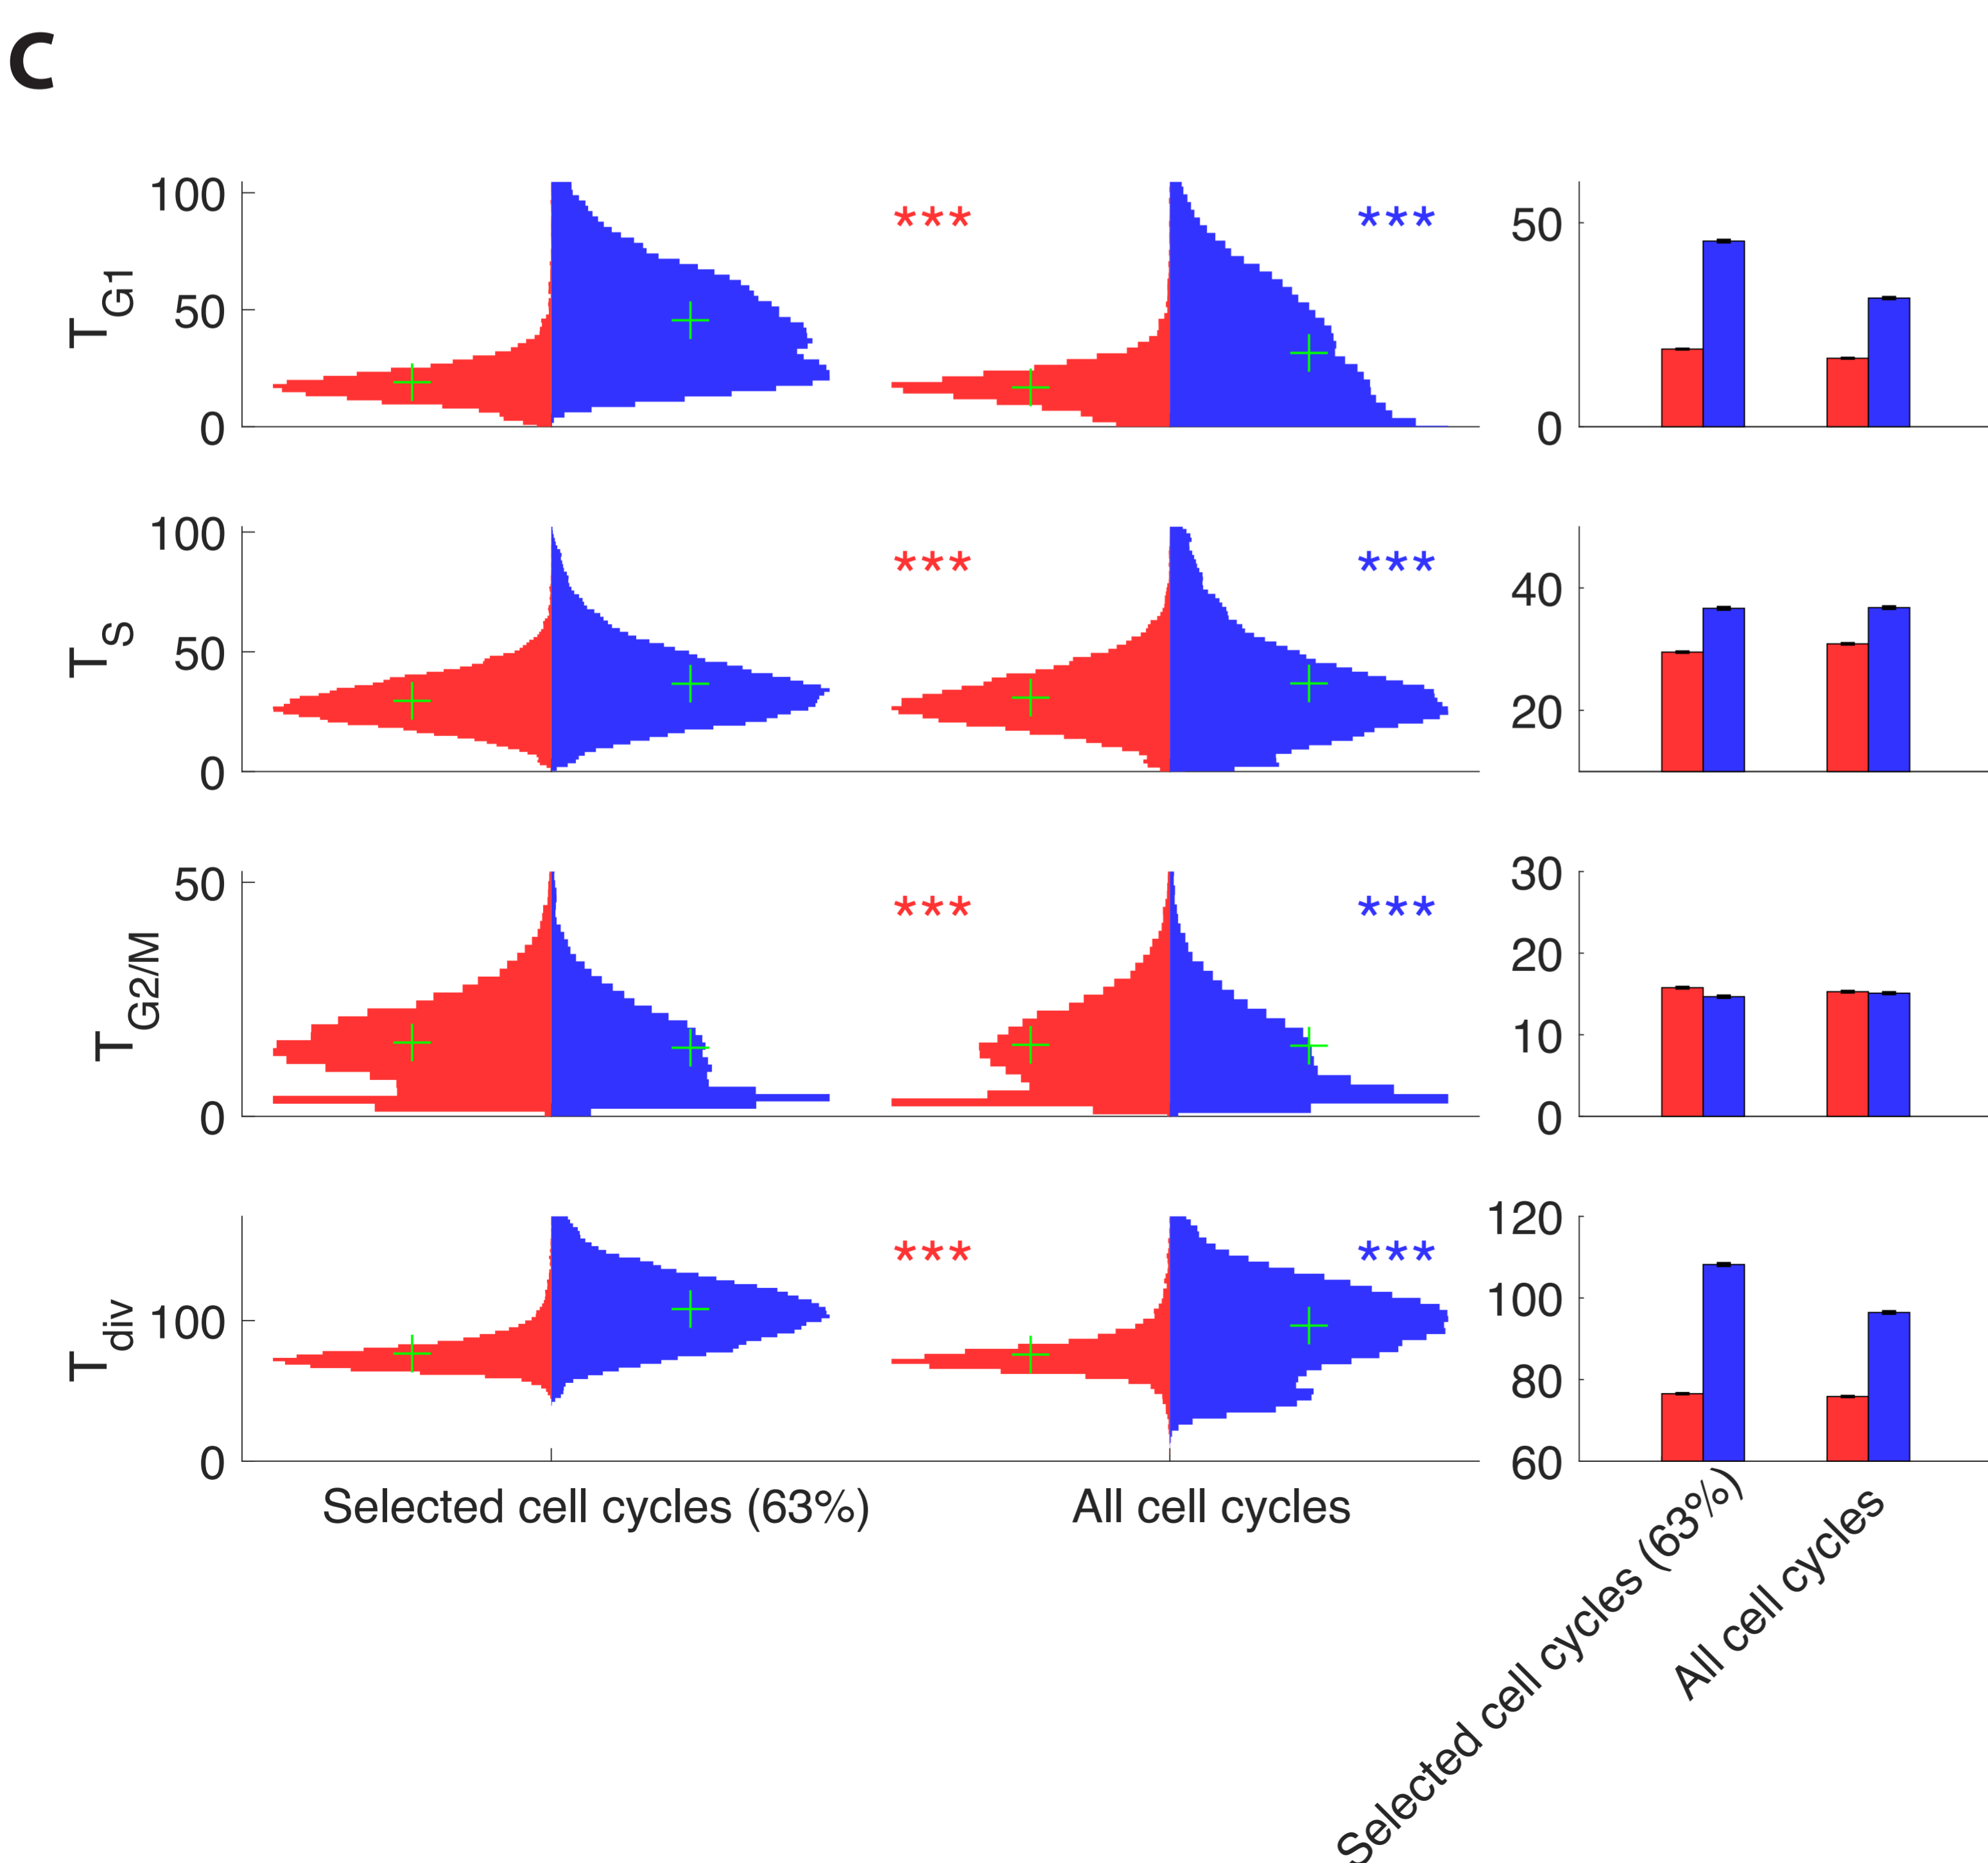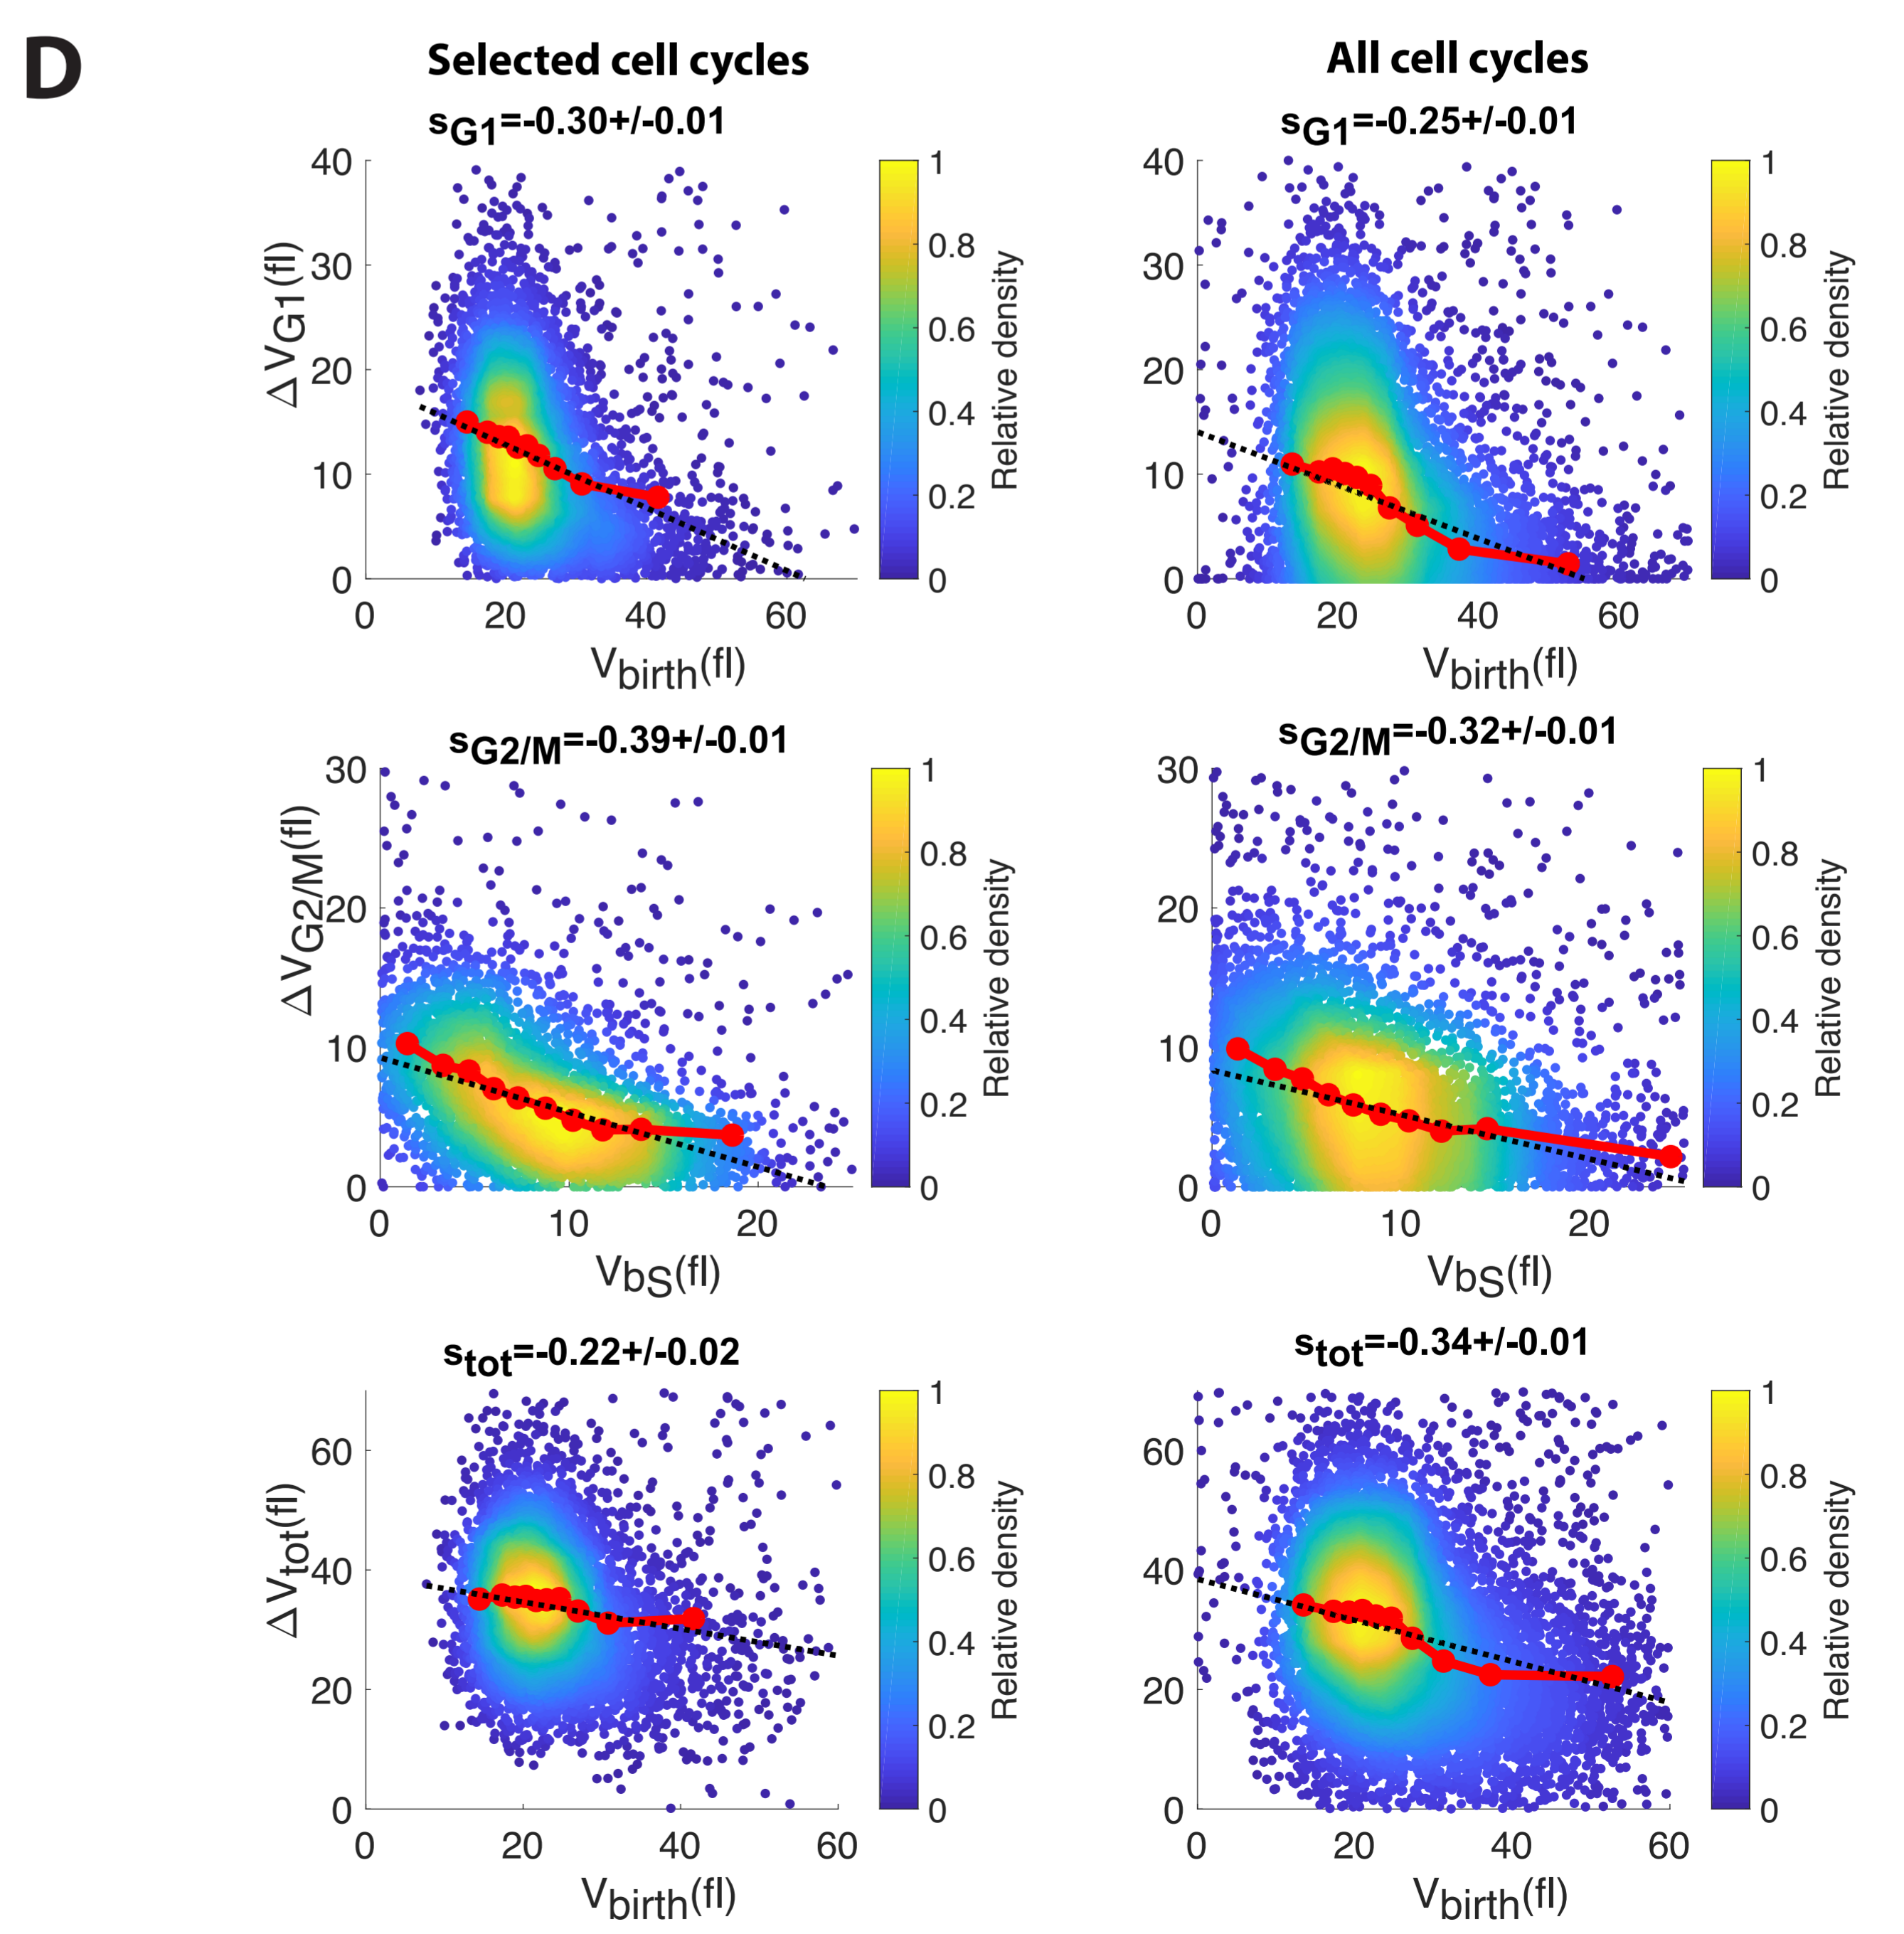

Supplement: supp [file elife-34025-supp-v1.zip › elife_poa_e34025_Figure_1_figure_supplement_7.pdf]

Figure 1 - Figure Supplement 1

**A**

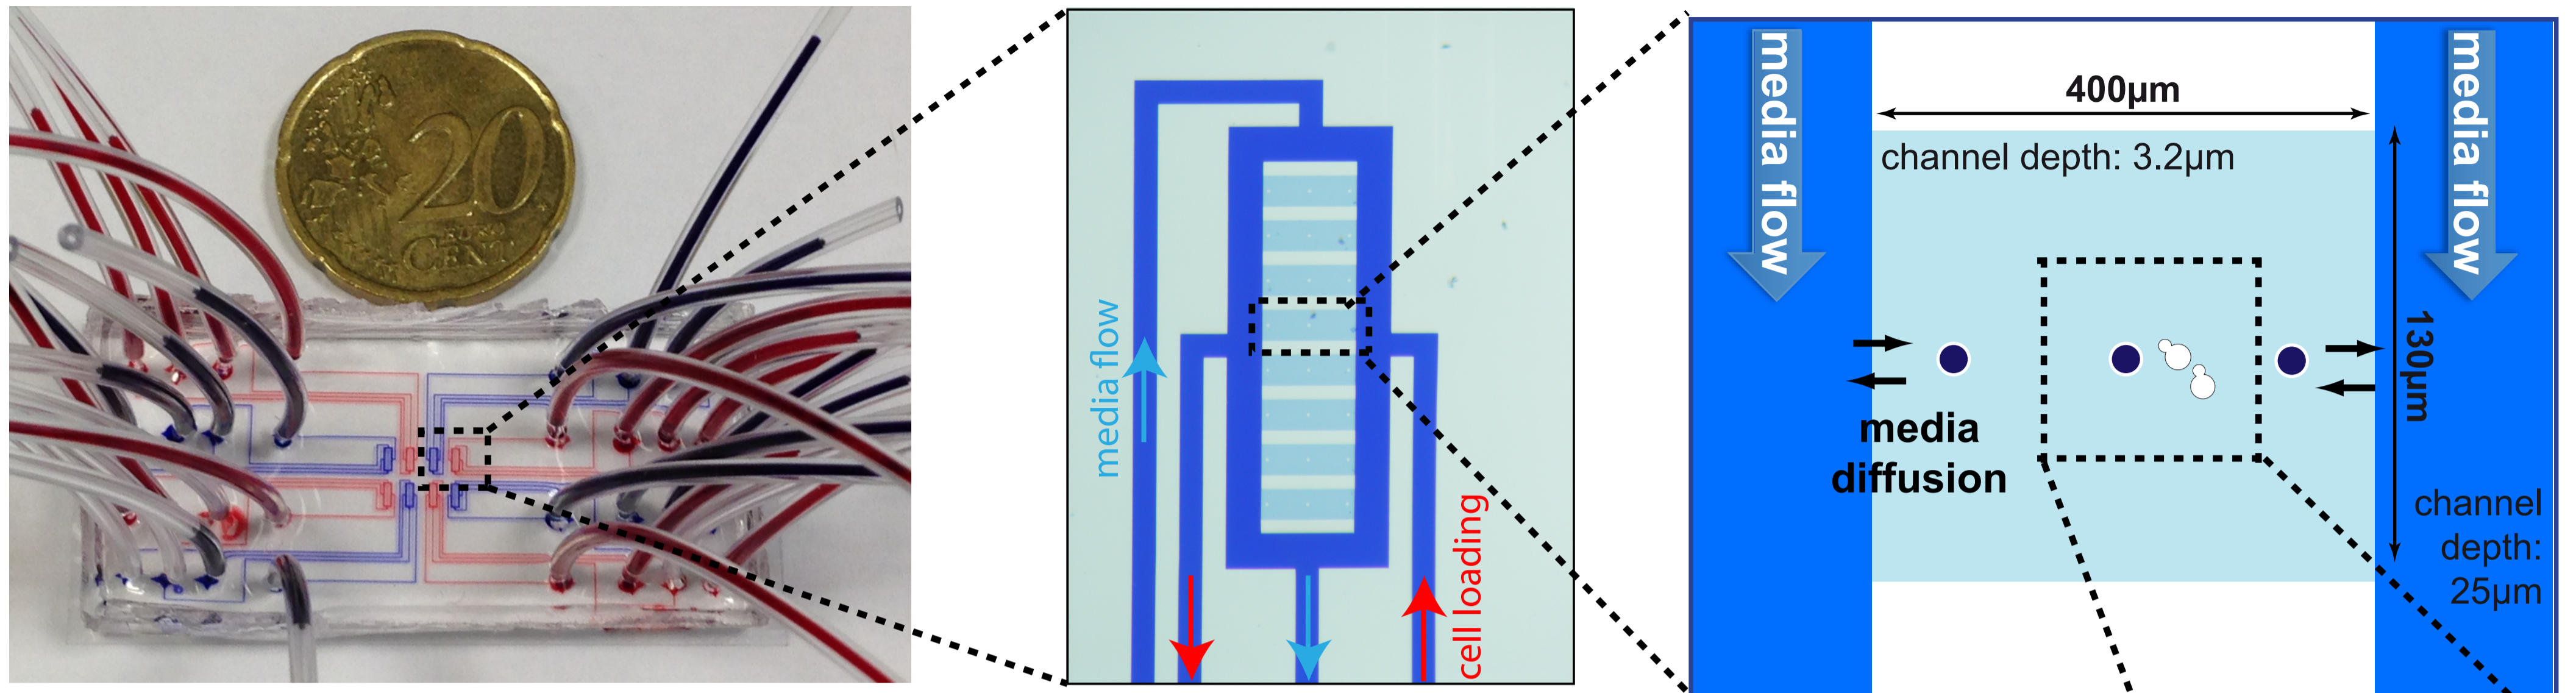

**B**

Phase contrast

3 min

84 min

165 min

246 min

327 min

408 min

GFP Fluorescence

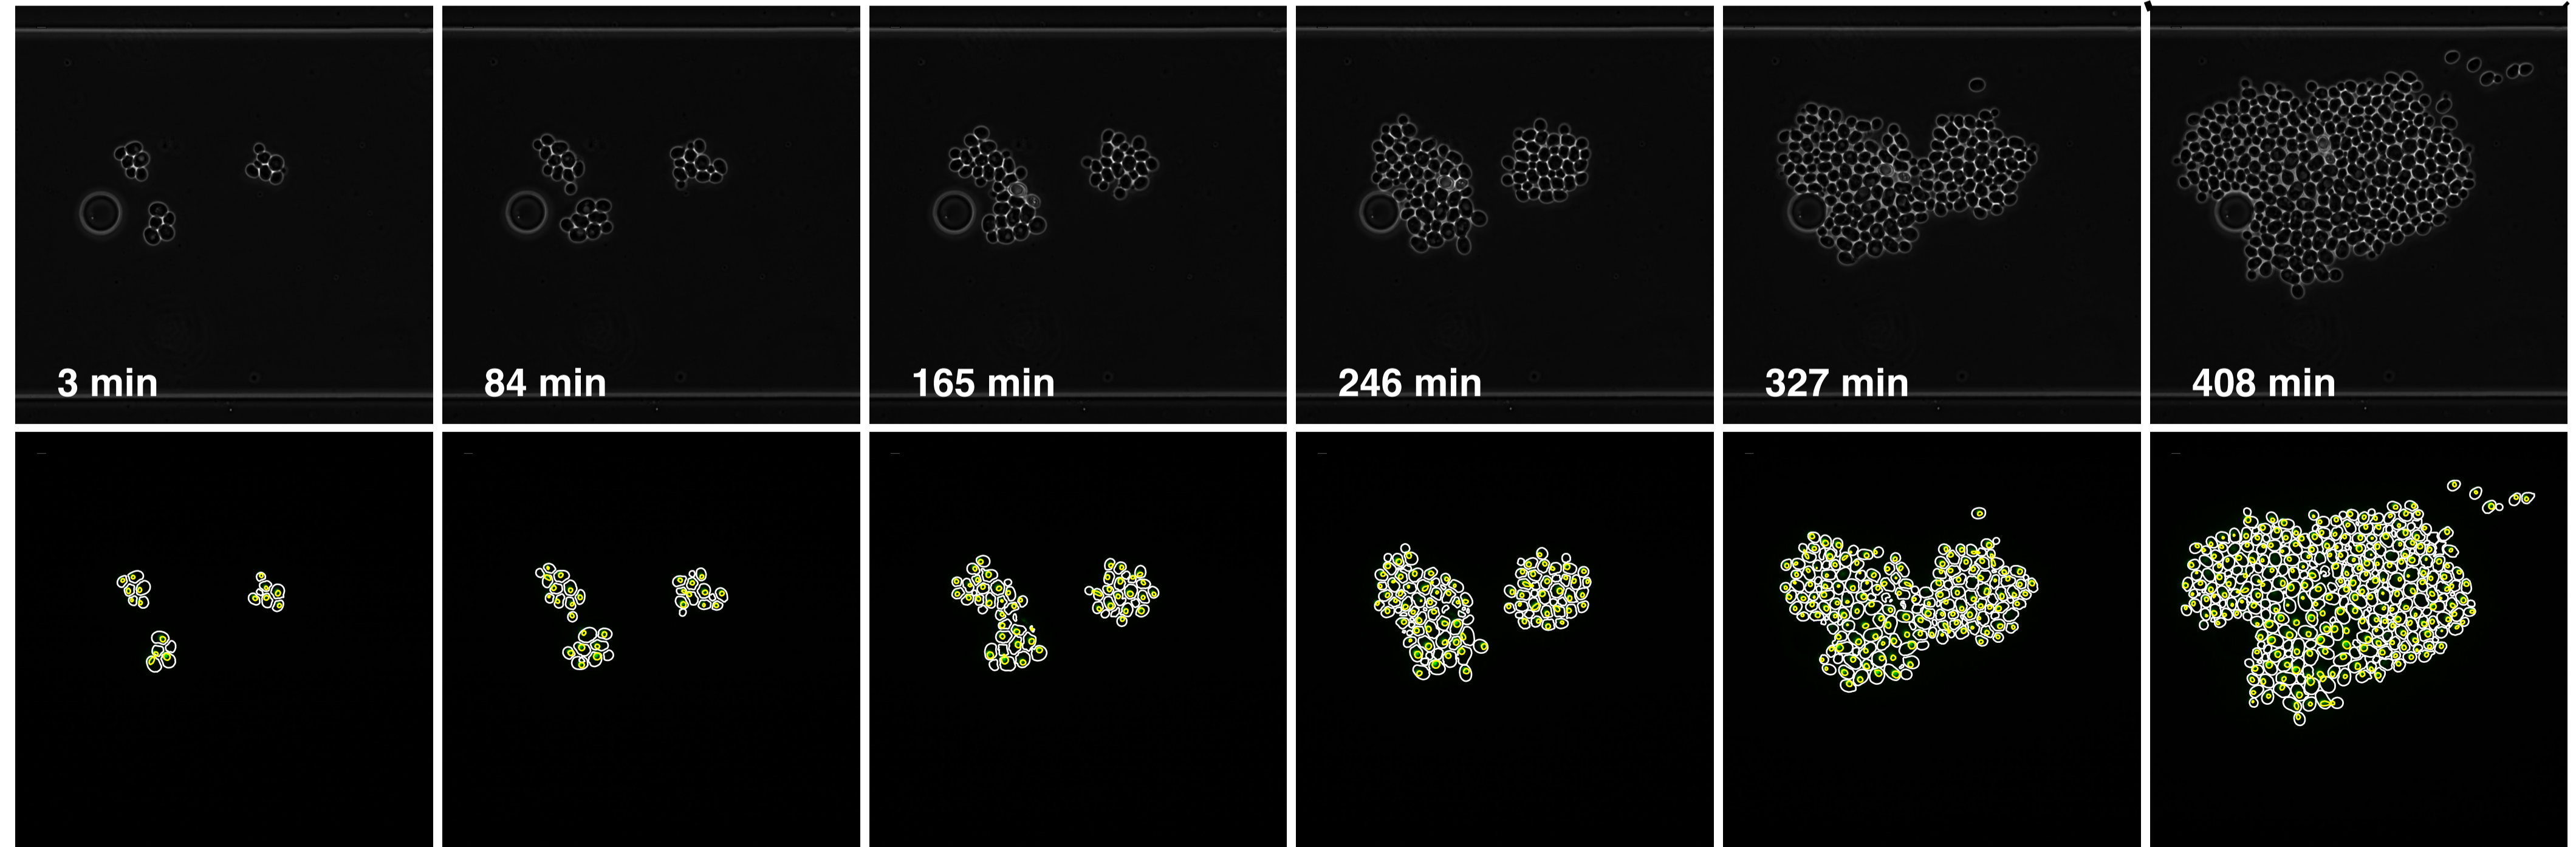

Supplement: supp [file elife-34025-supp-v1.zip › elife_poa_e34025_Figure_1_figure_supplement_1.pdf]

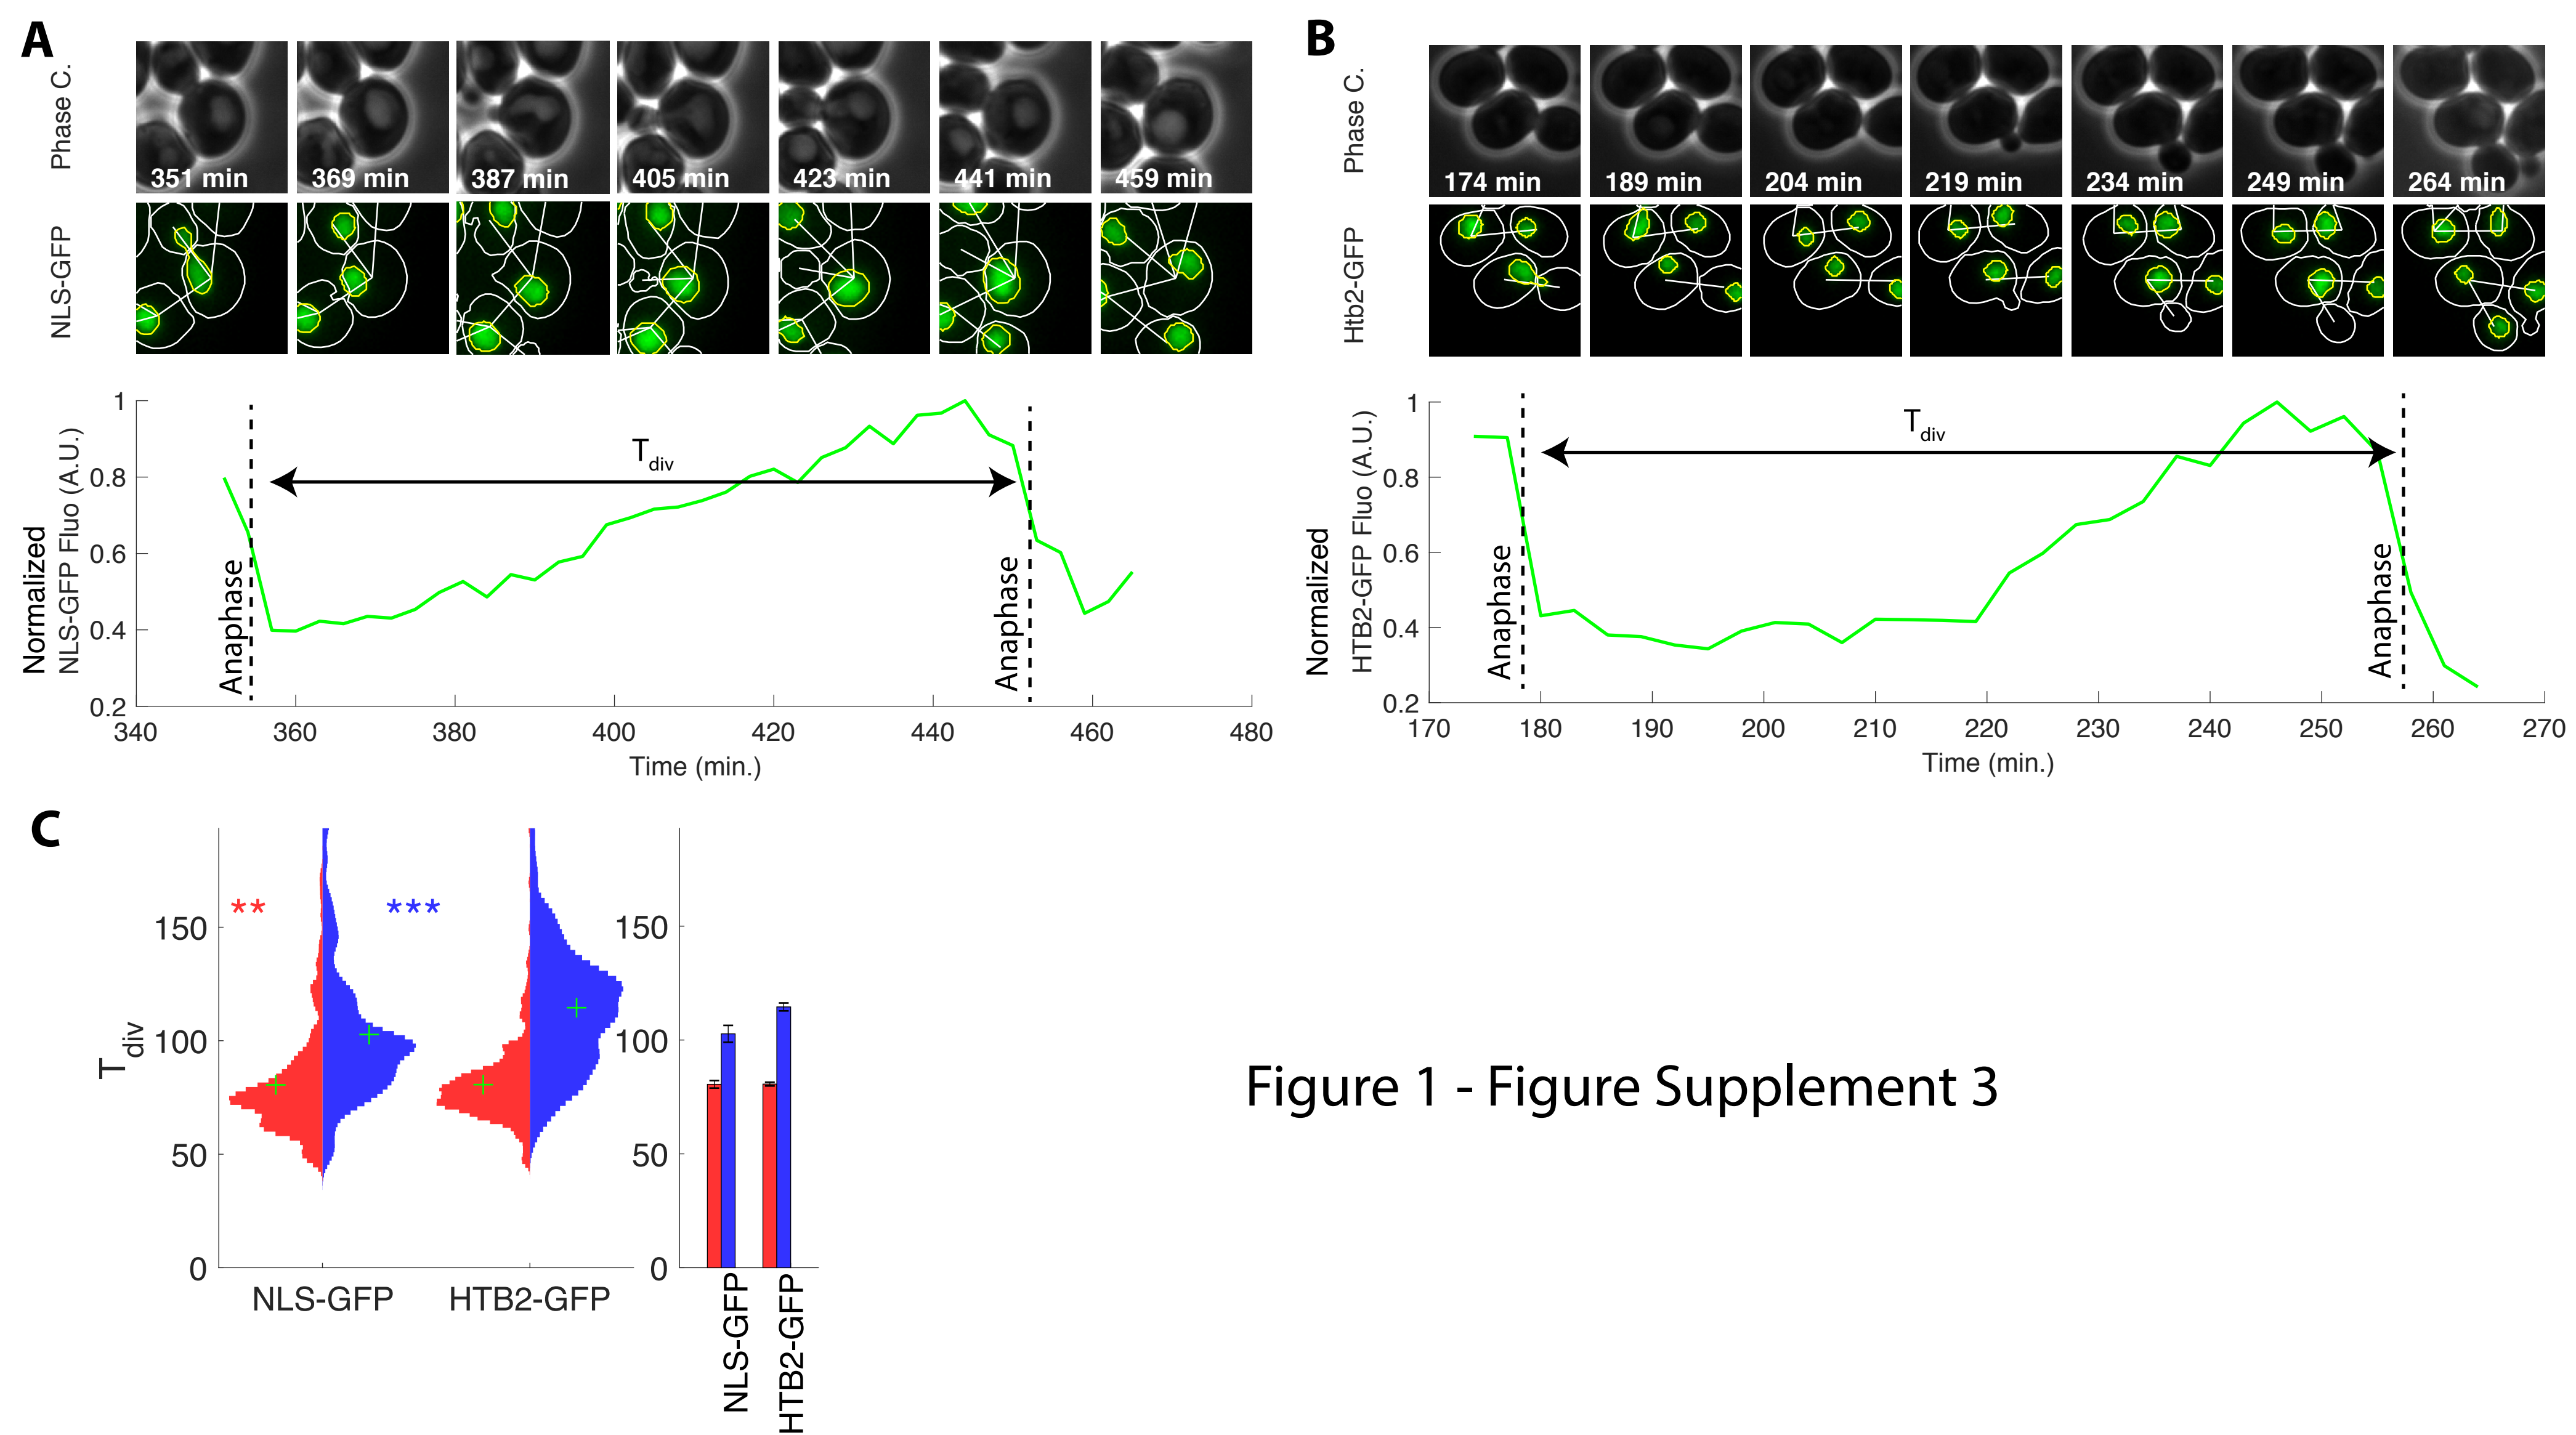

Supplement: supp [file elife-34025-supp-v1.zip › elife_poa_e34025_Figure_1_figure_supplement_3.pdf]

Figure 1 - Figure Supplement 2

**A**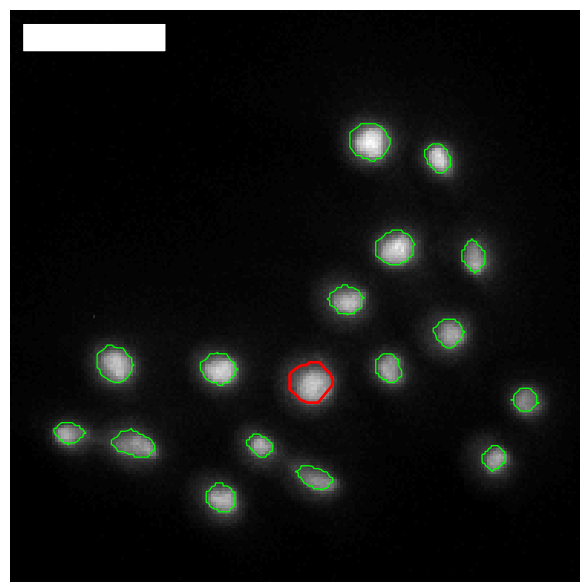**B**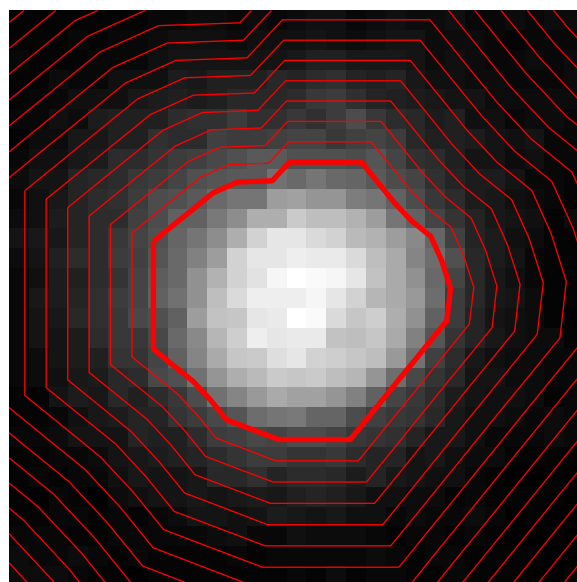**C**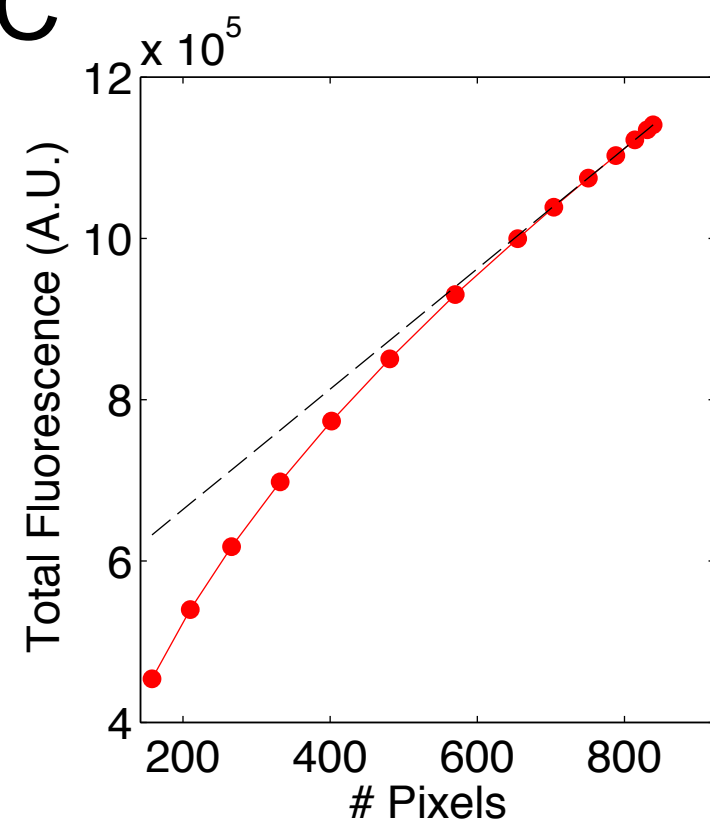**D**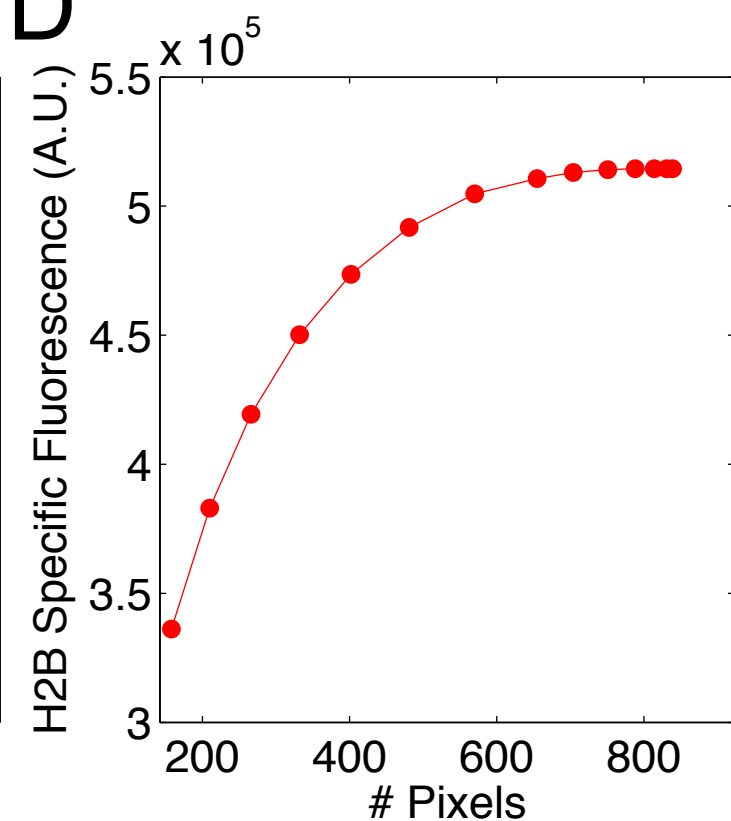**E**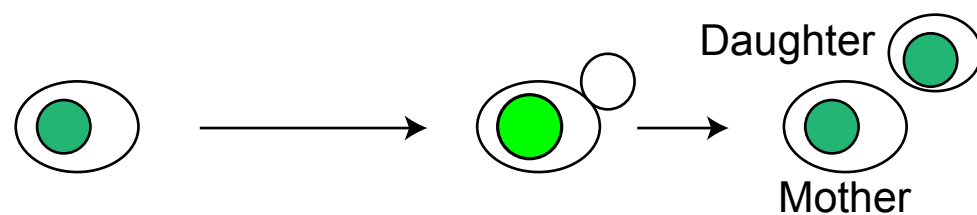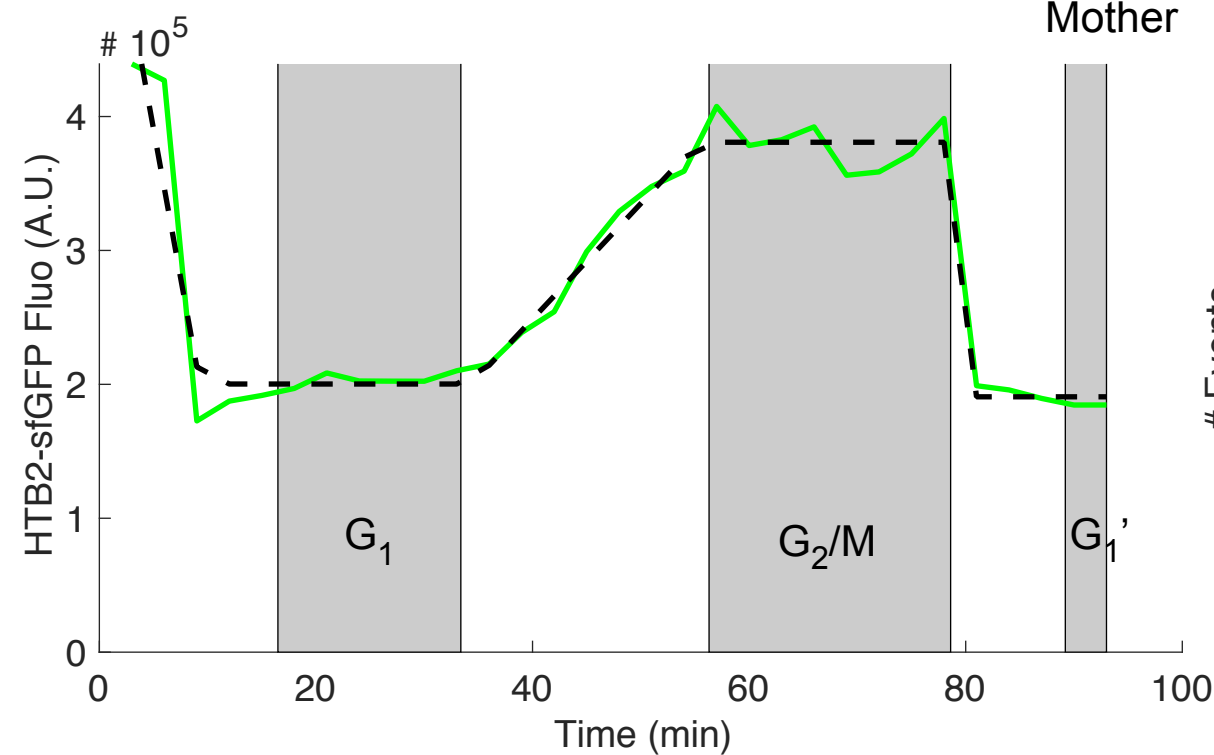**F**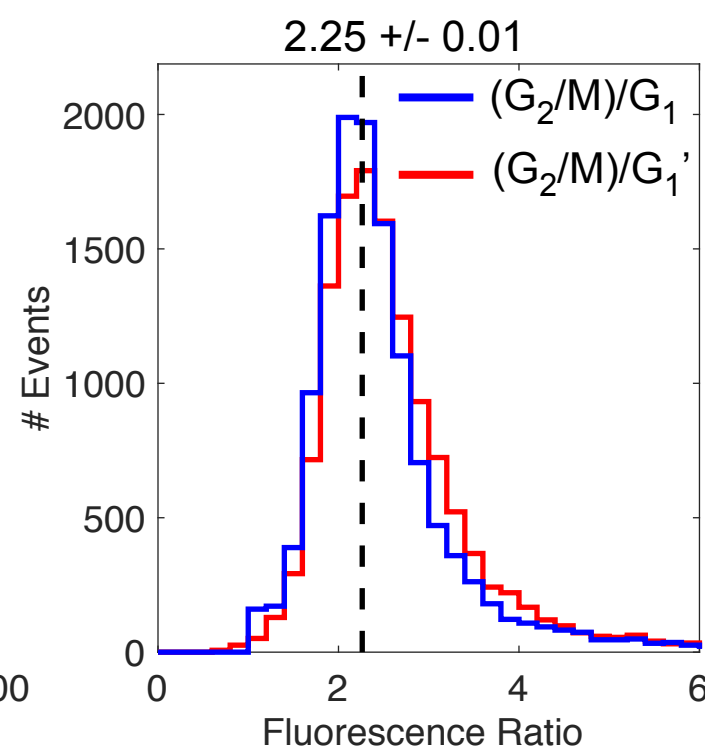**G**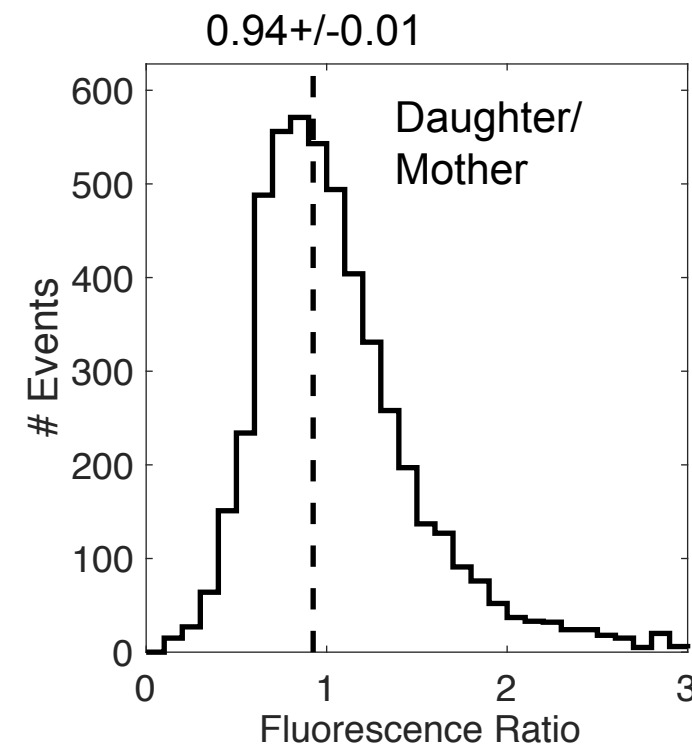

Supplement: supp [file elife-34025-supp-v1.zip › elife_poa_e34025_Figure_1_figure_supplement_2.pdf]

Figure 1 - Figure Supplement 8

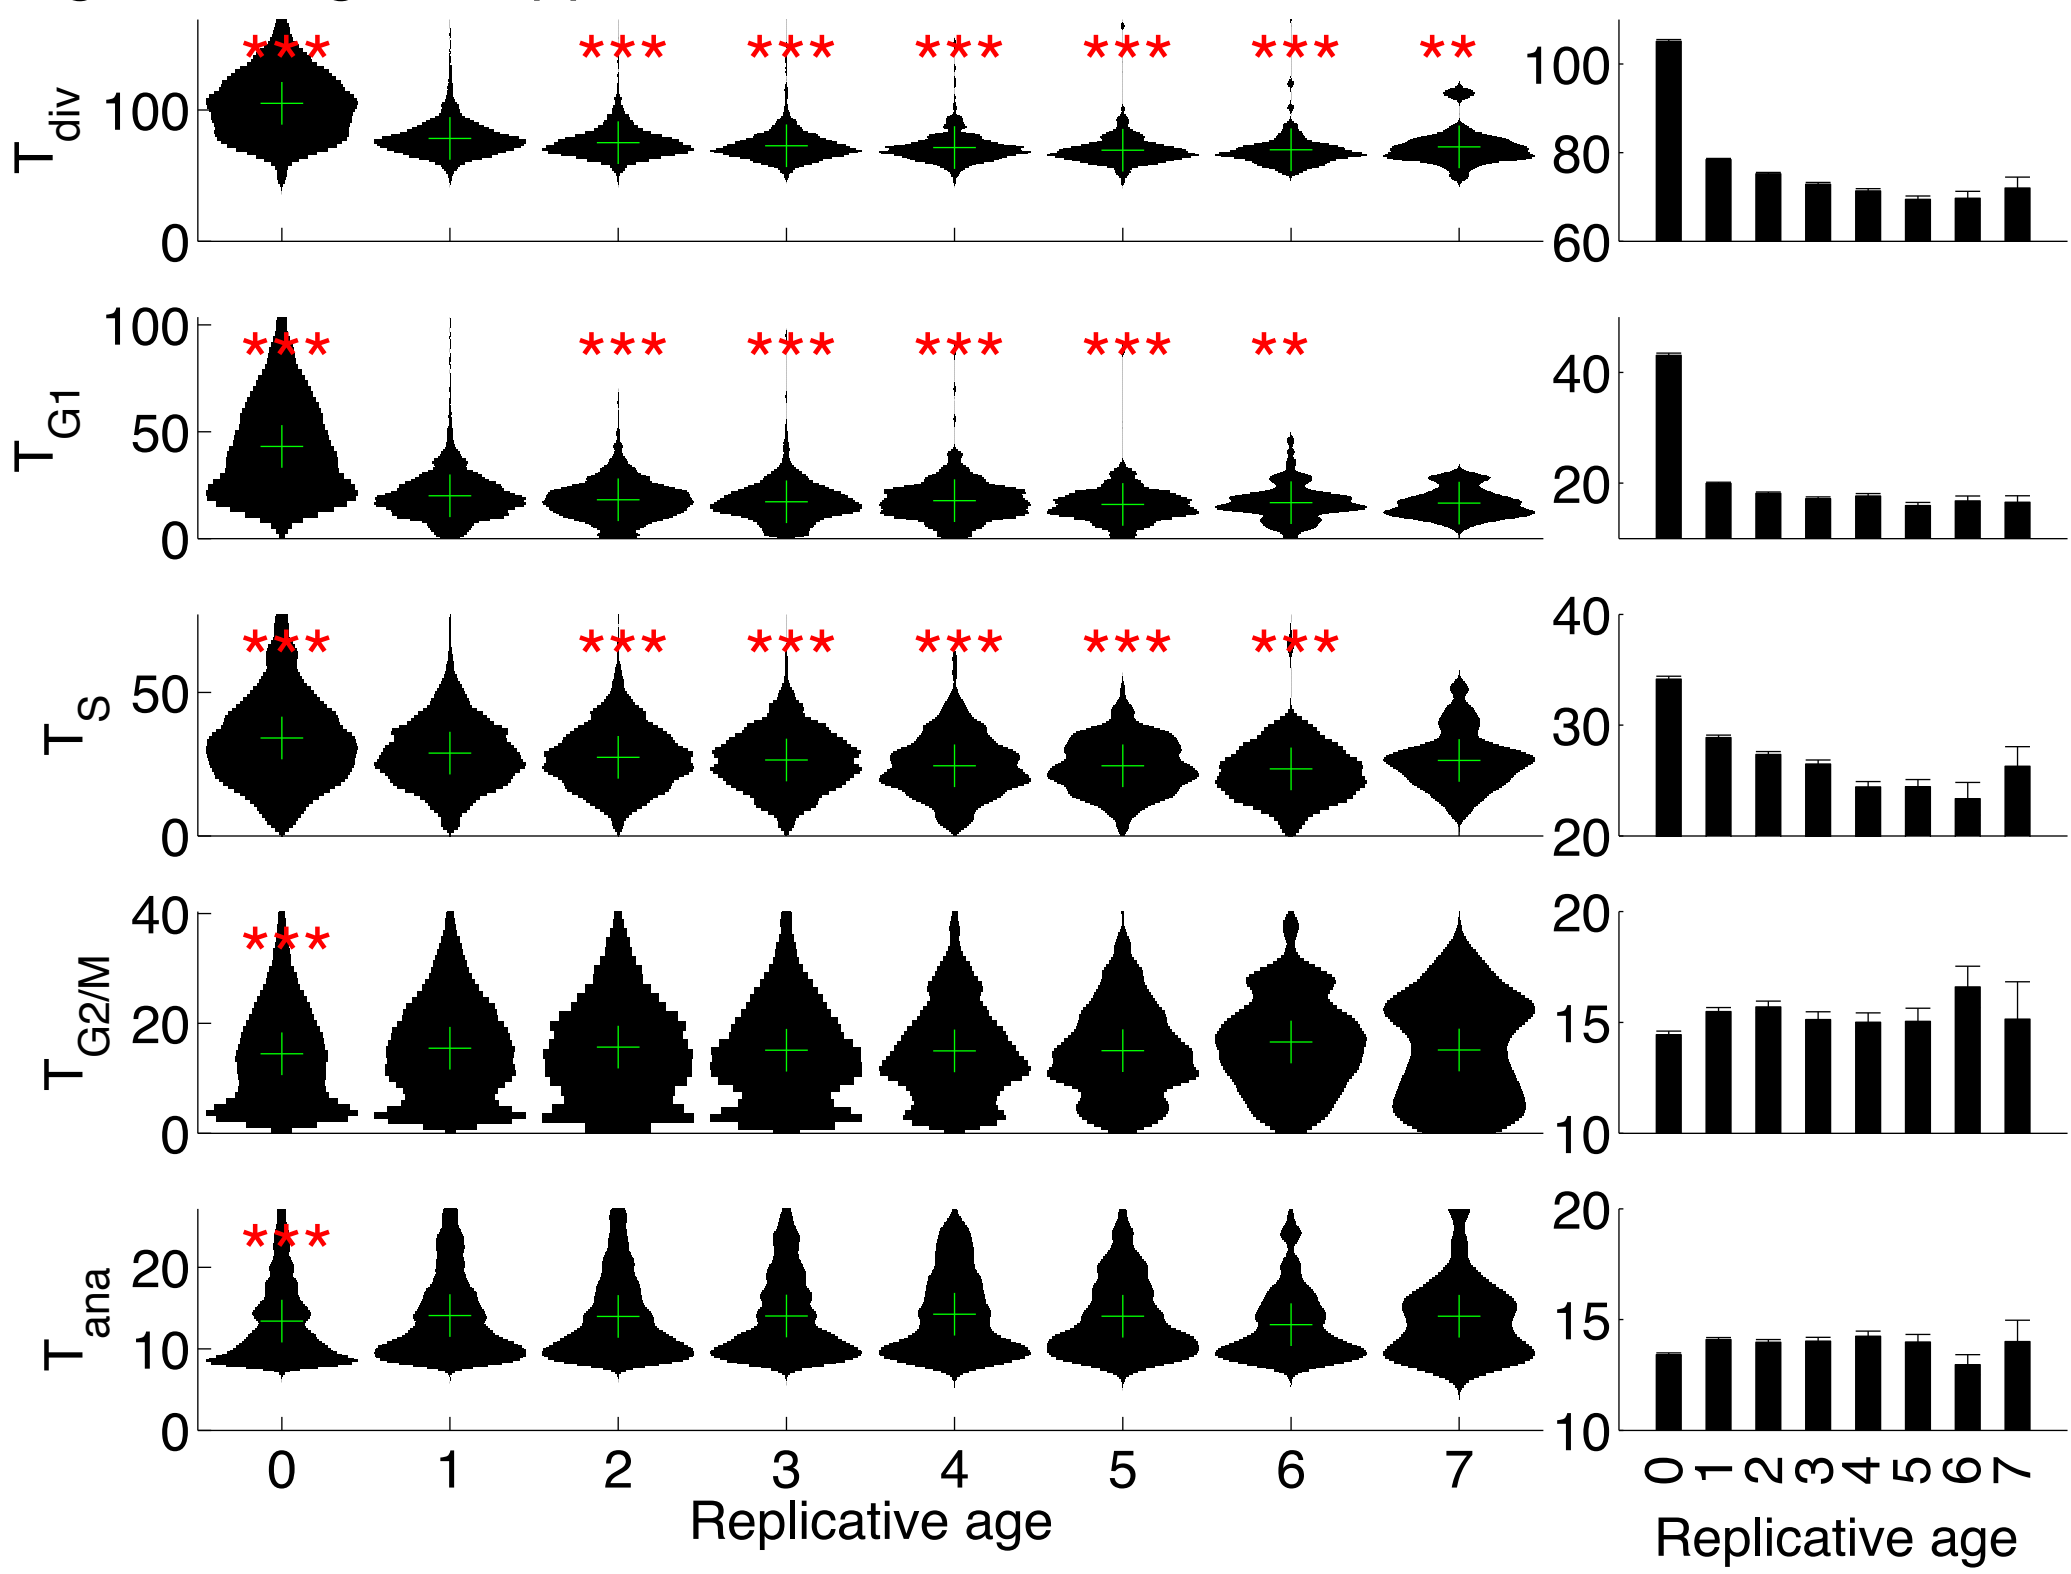

Supplement: supp [file elife-34025-supp-v1.zip › elife_poa_e34025_Figure_1_figure_supplement_9.pdf]

**A** Figure 3 - figure supplement 1

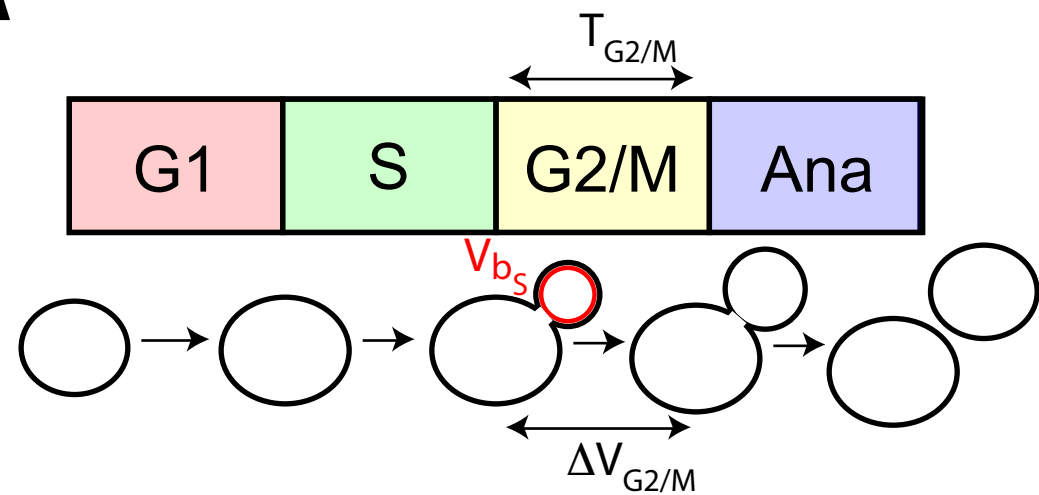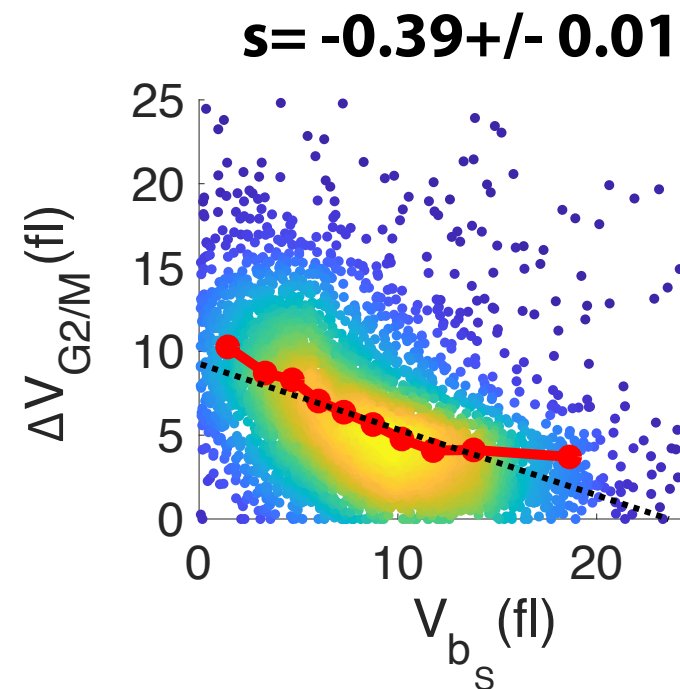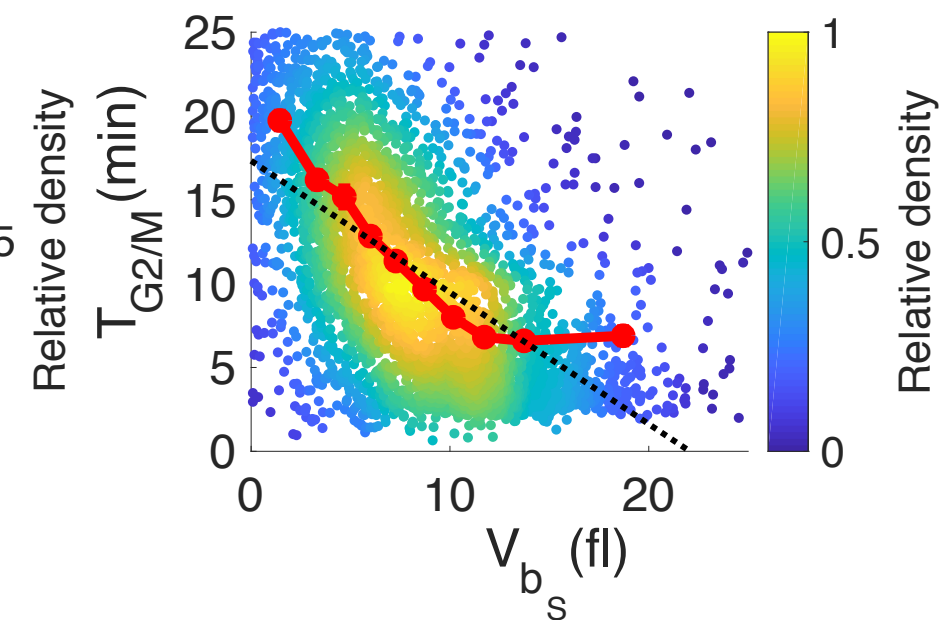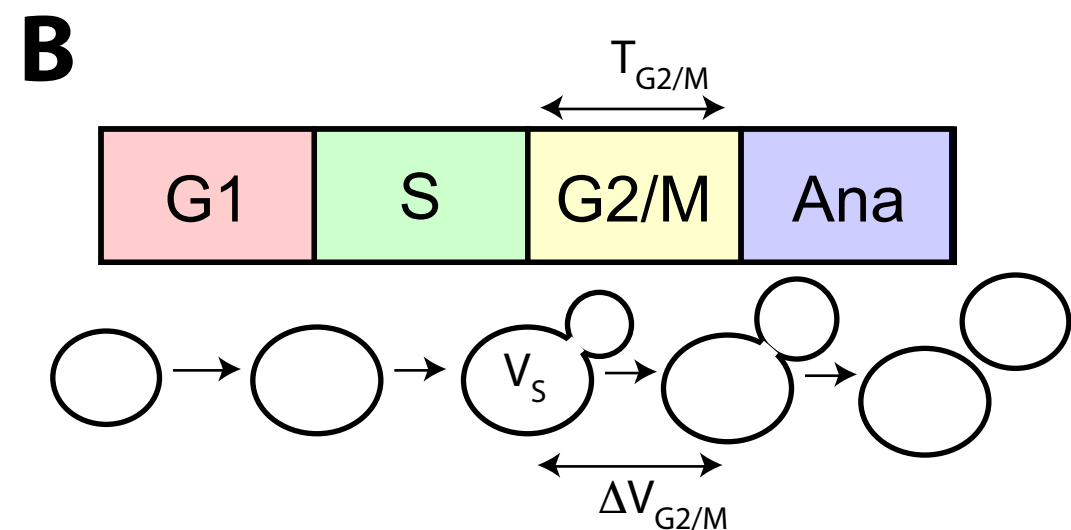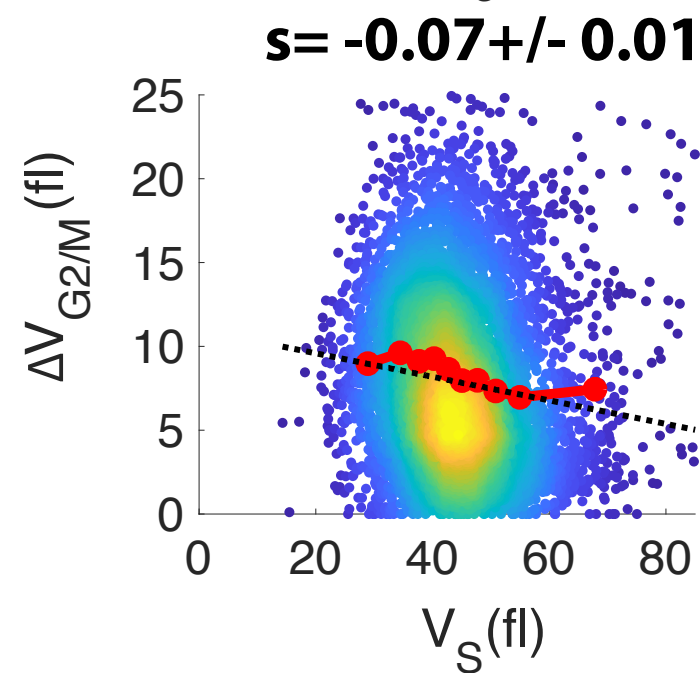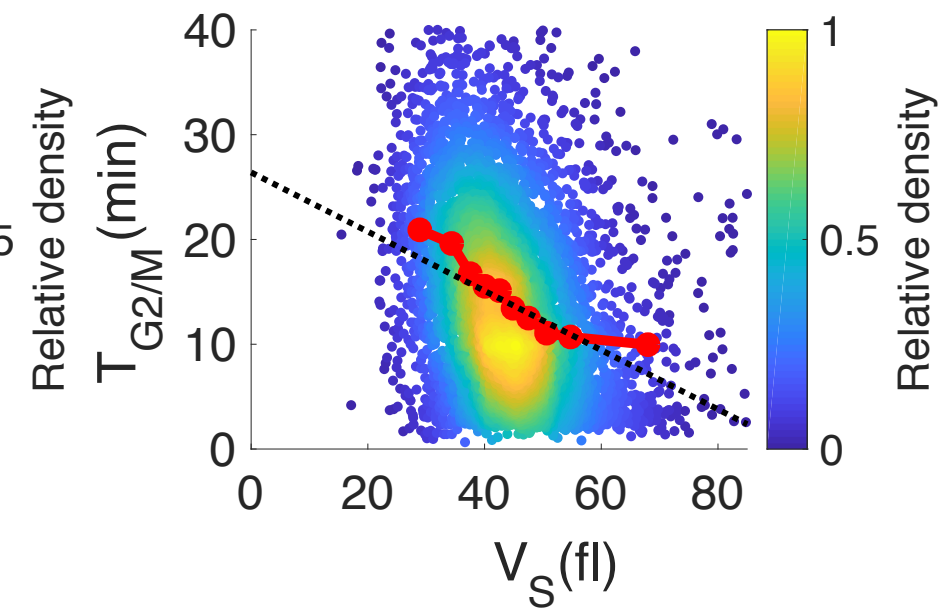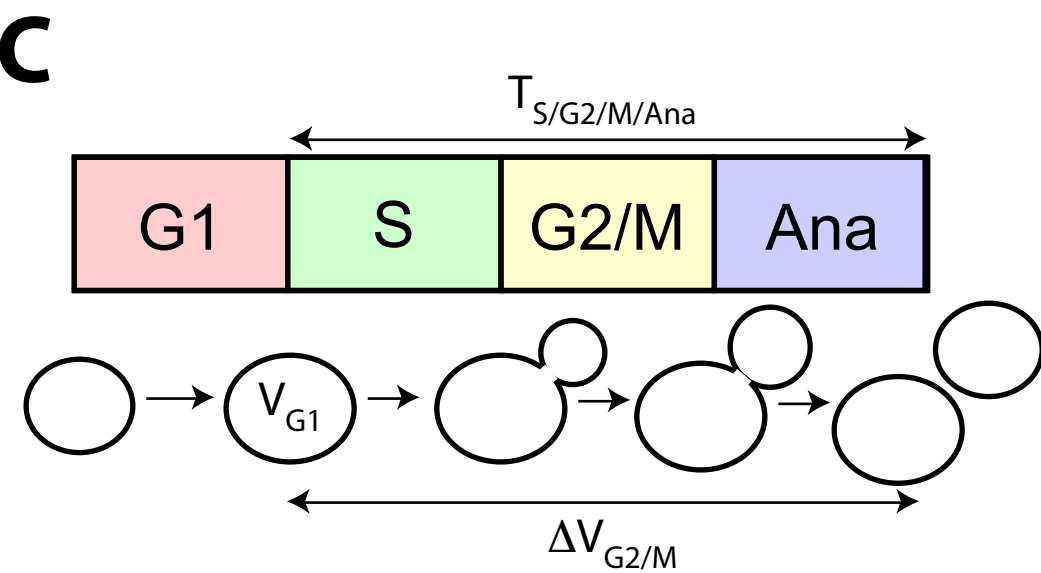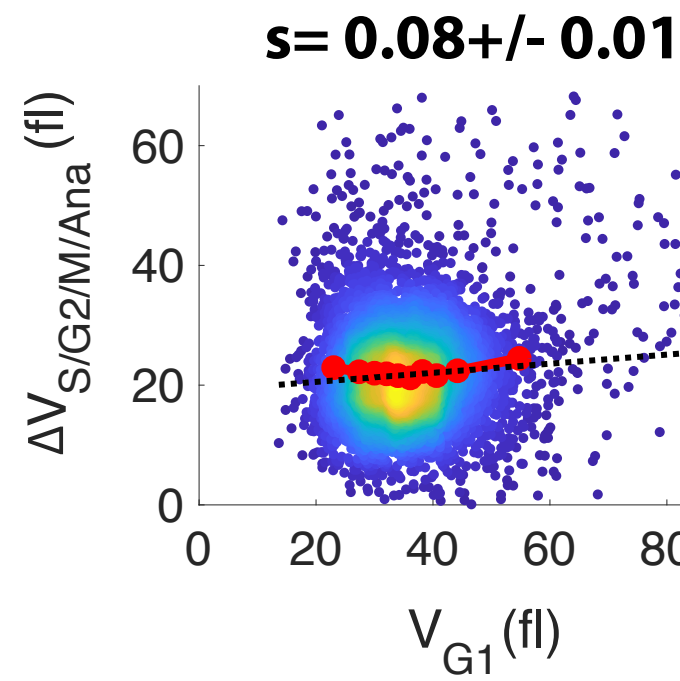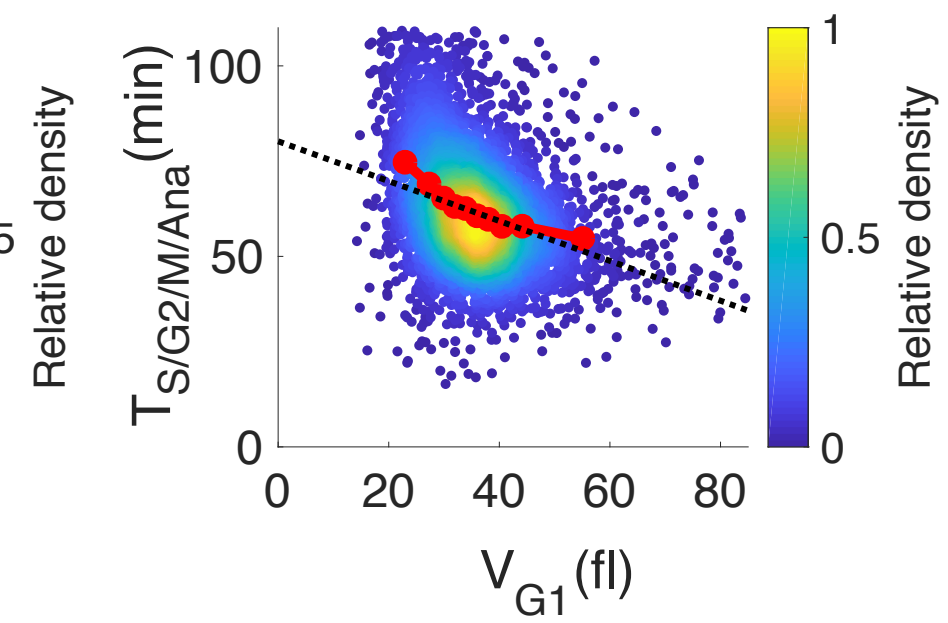

Supplement: supp [file elife-34025-supp-v1.zip › elife_poa_e34025_Figure_3_figure_supplement_1.pdf]

Figure 1 - Figure Supplement 4

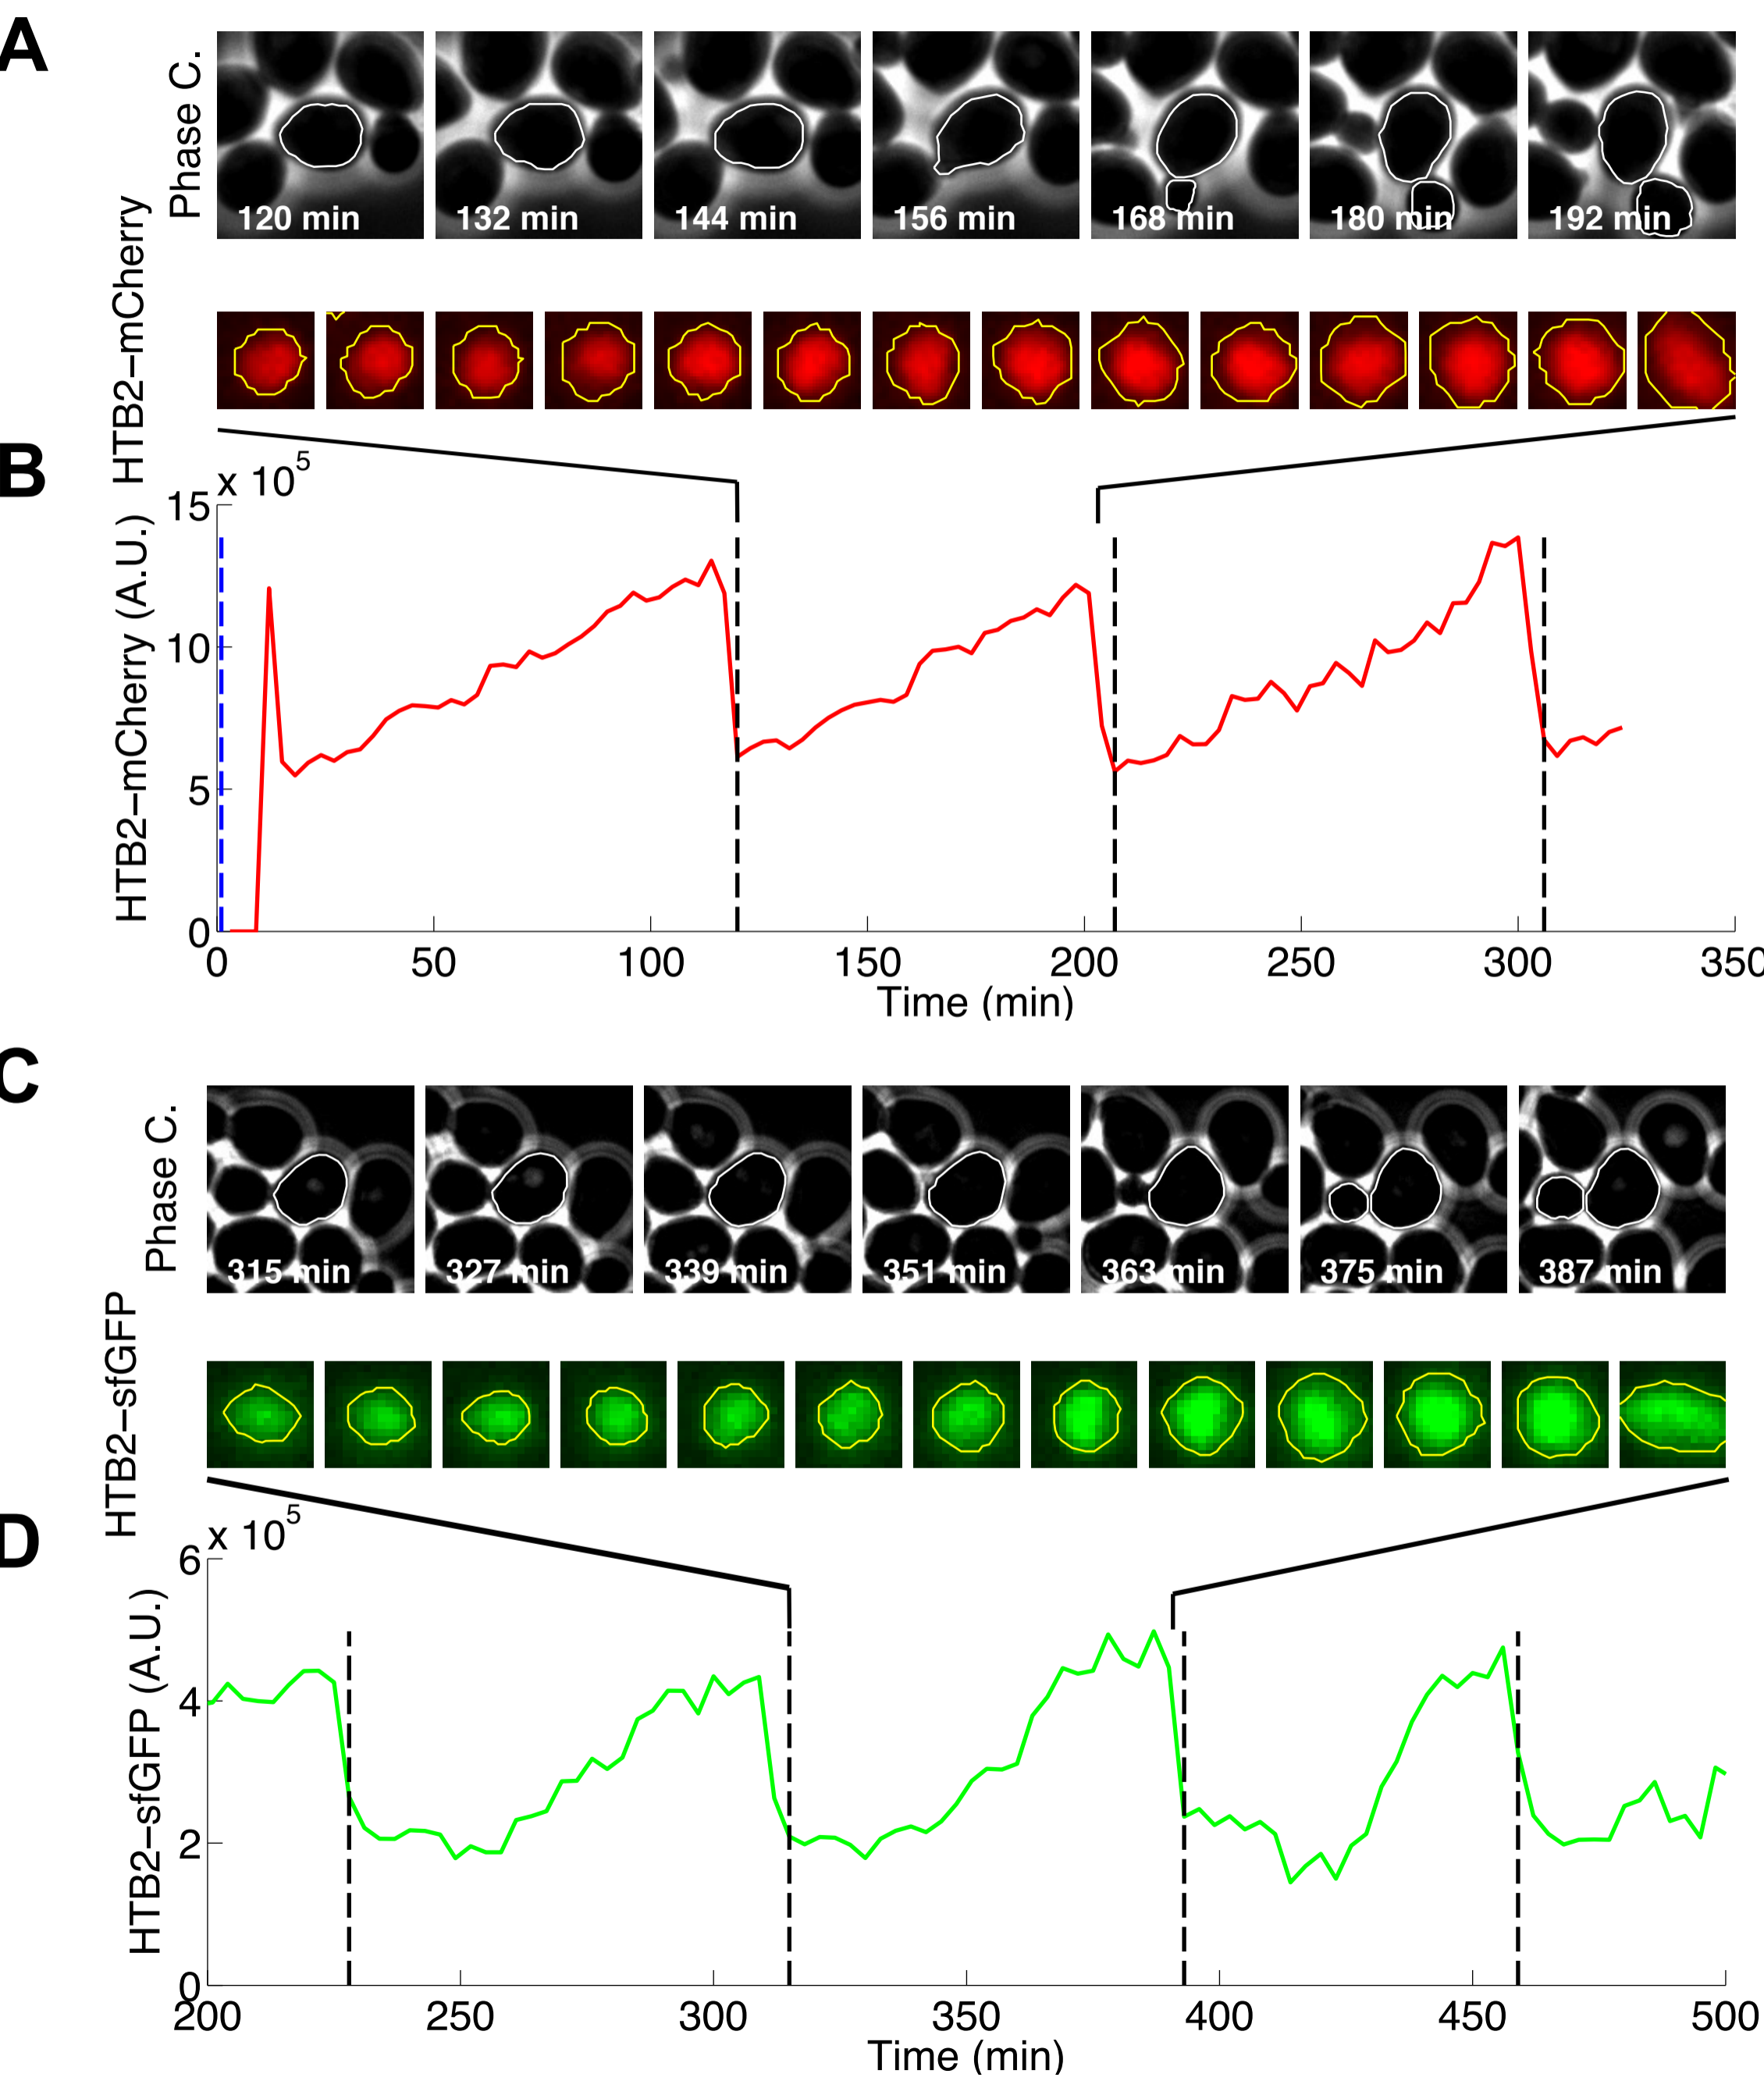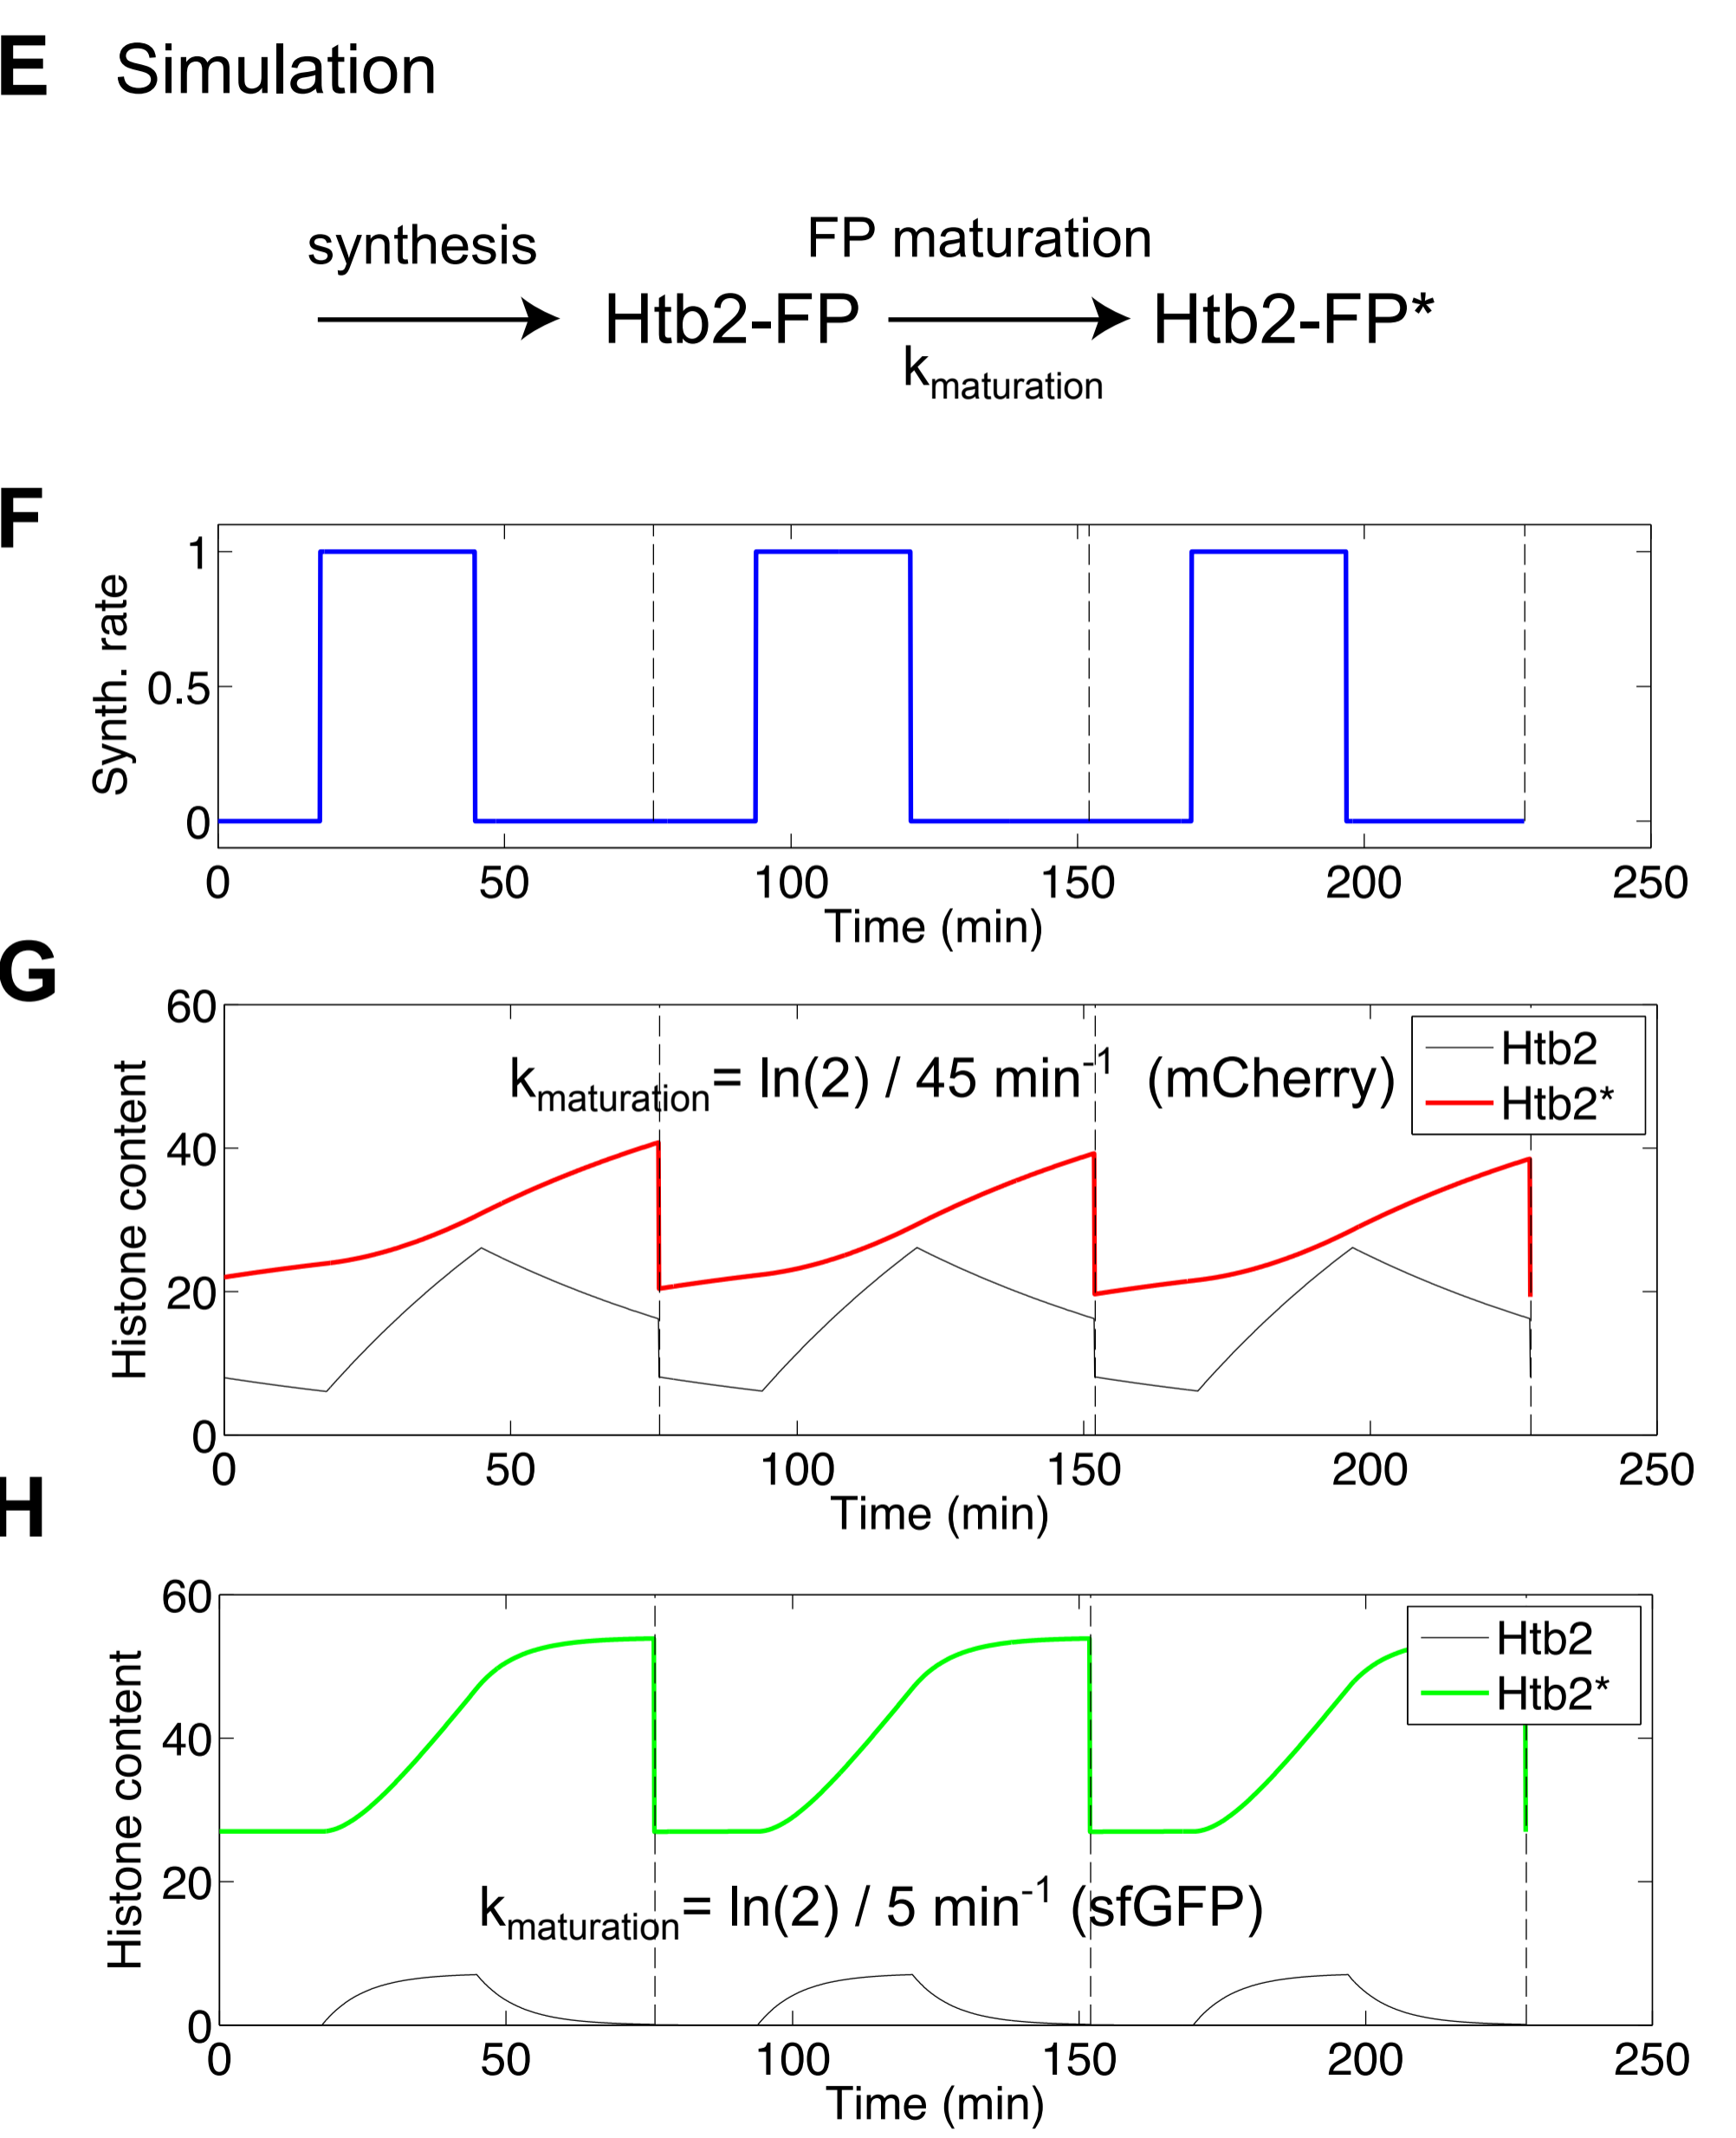

Supplement: supp [file elife-34025-supp-v1.zip › elife_poa_e34025_Figure_1_figure_supplement_4.pdf]

# Figure 1 - Figure Supplement 7

# A

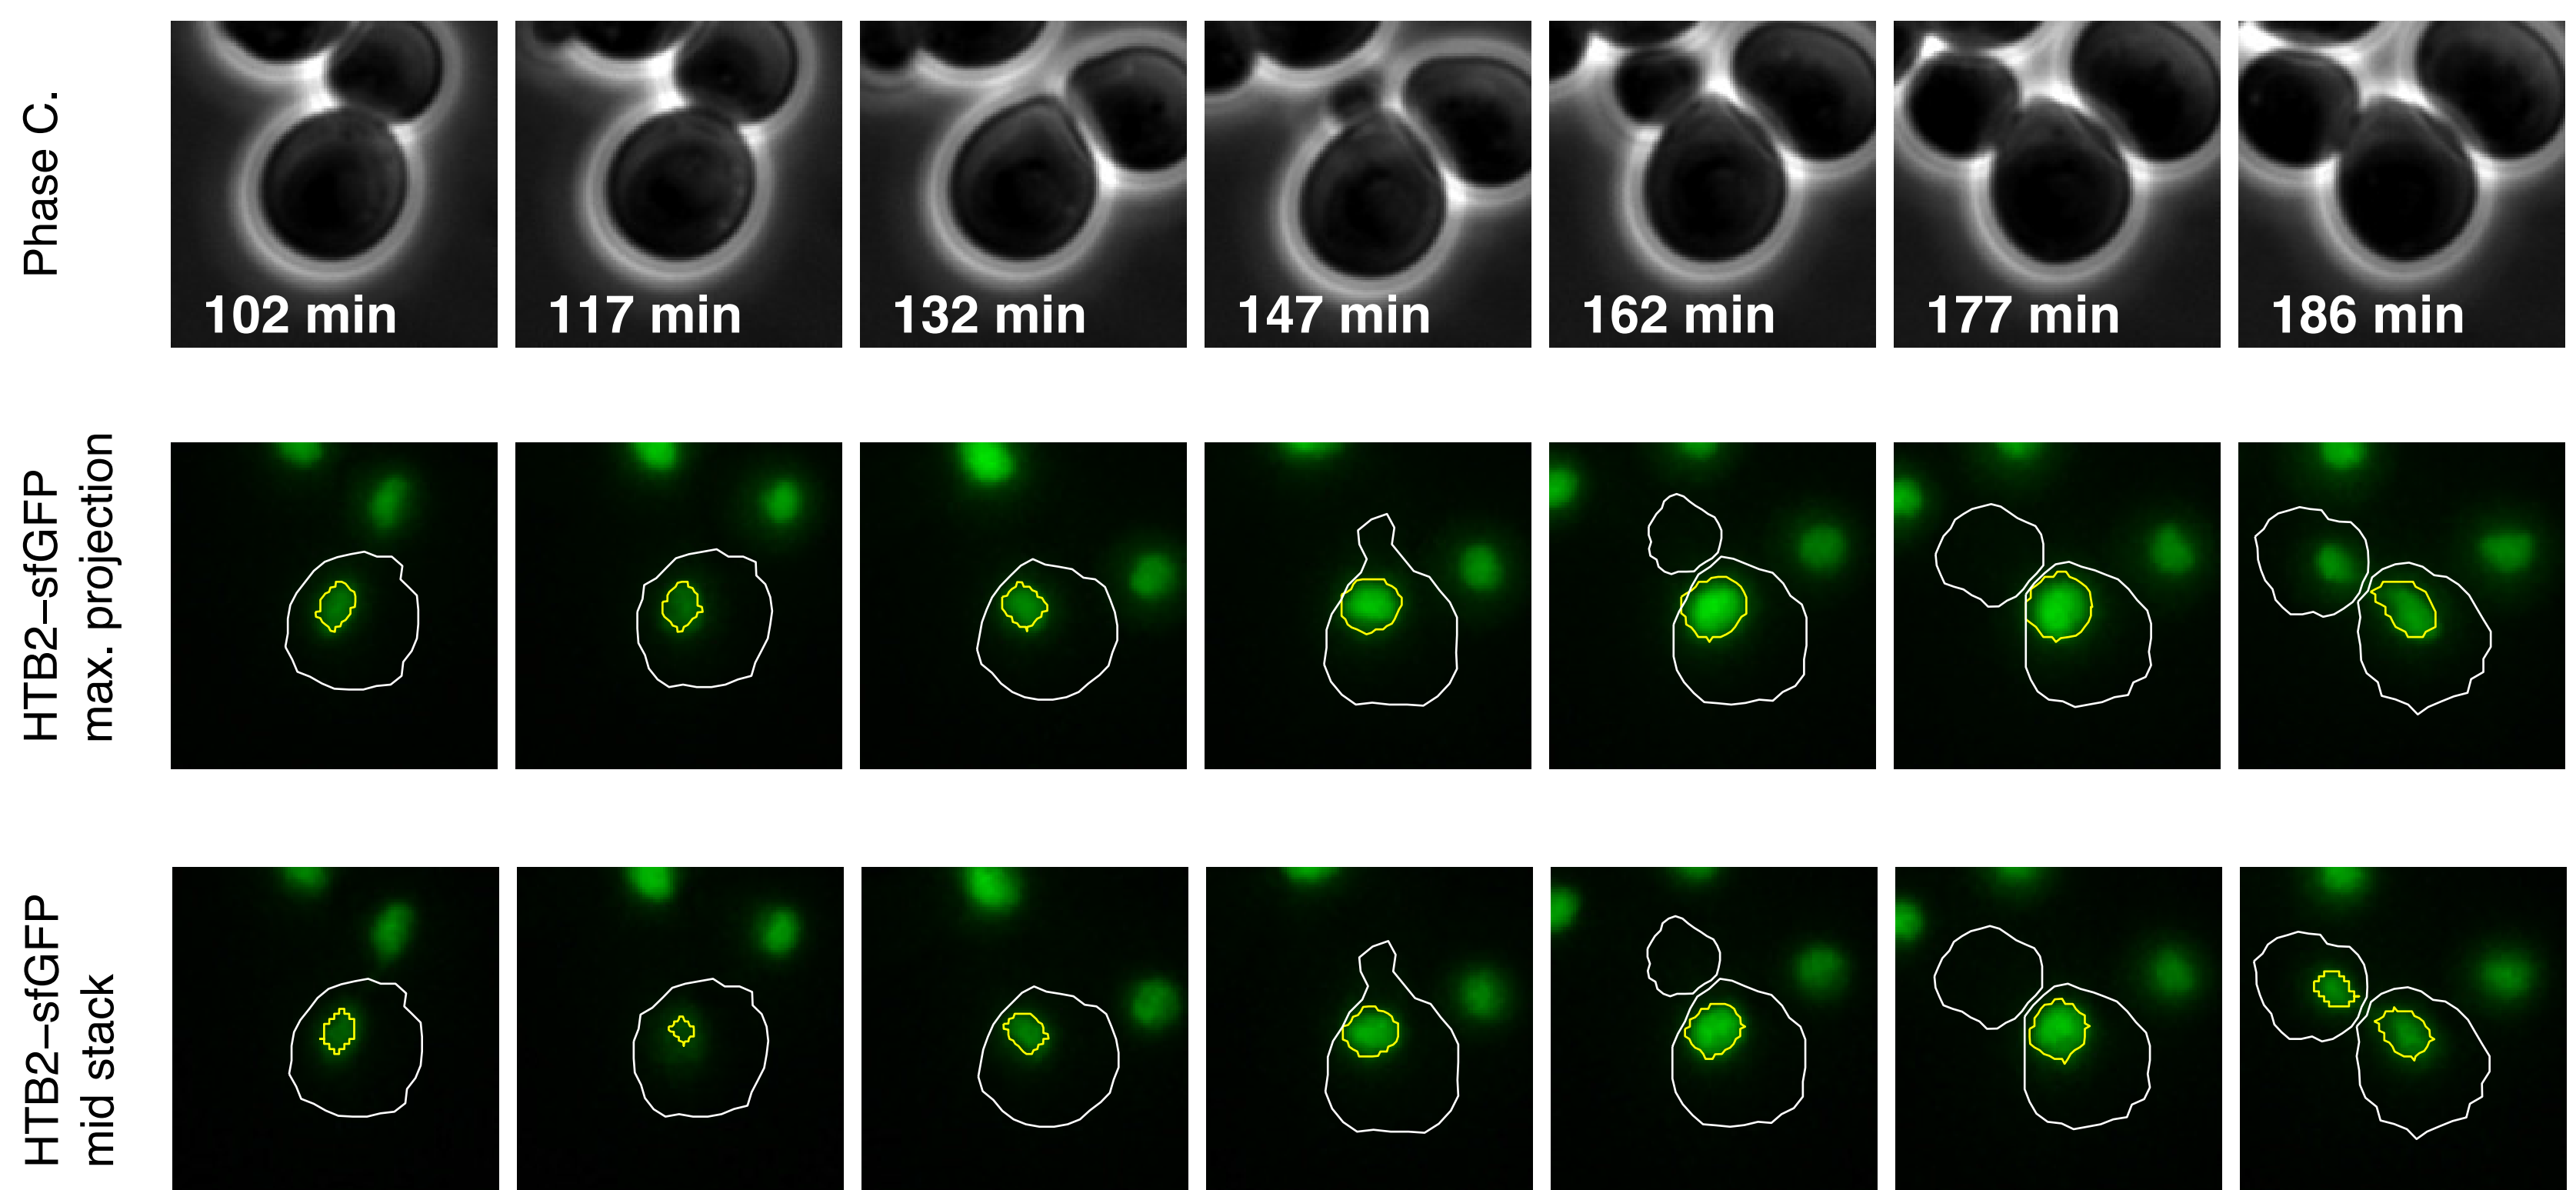

# B

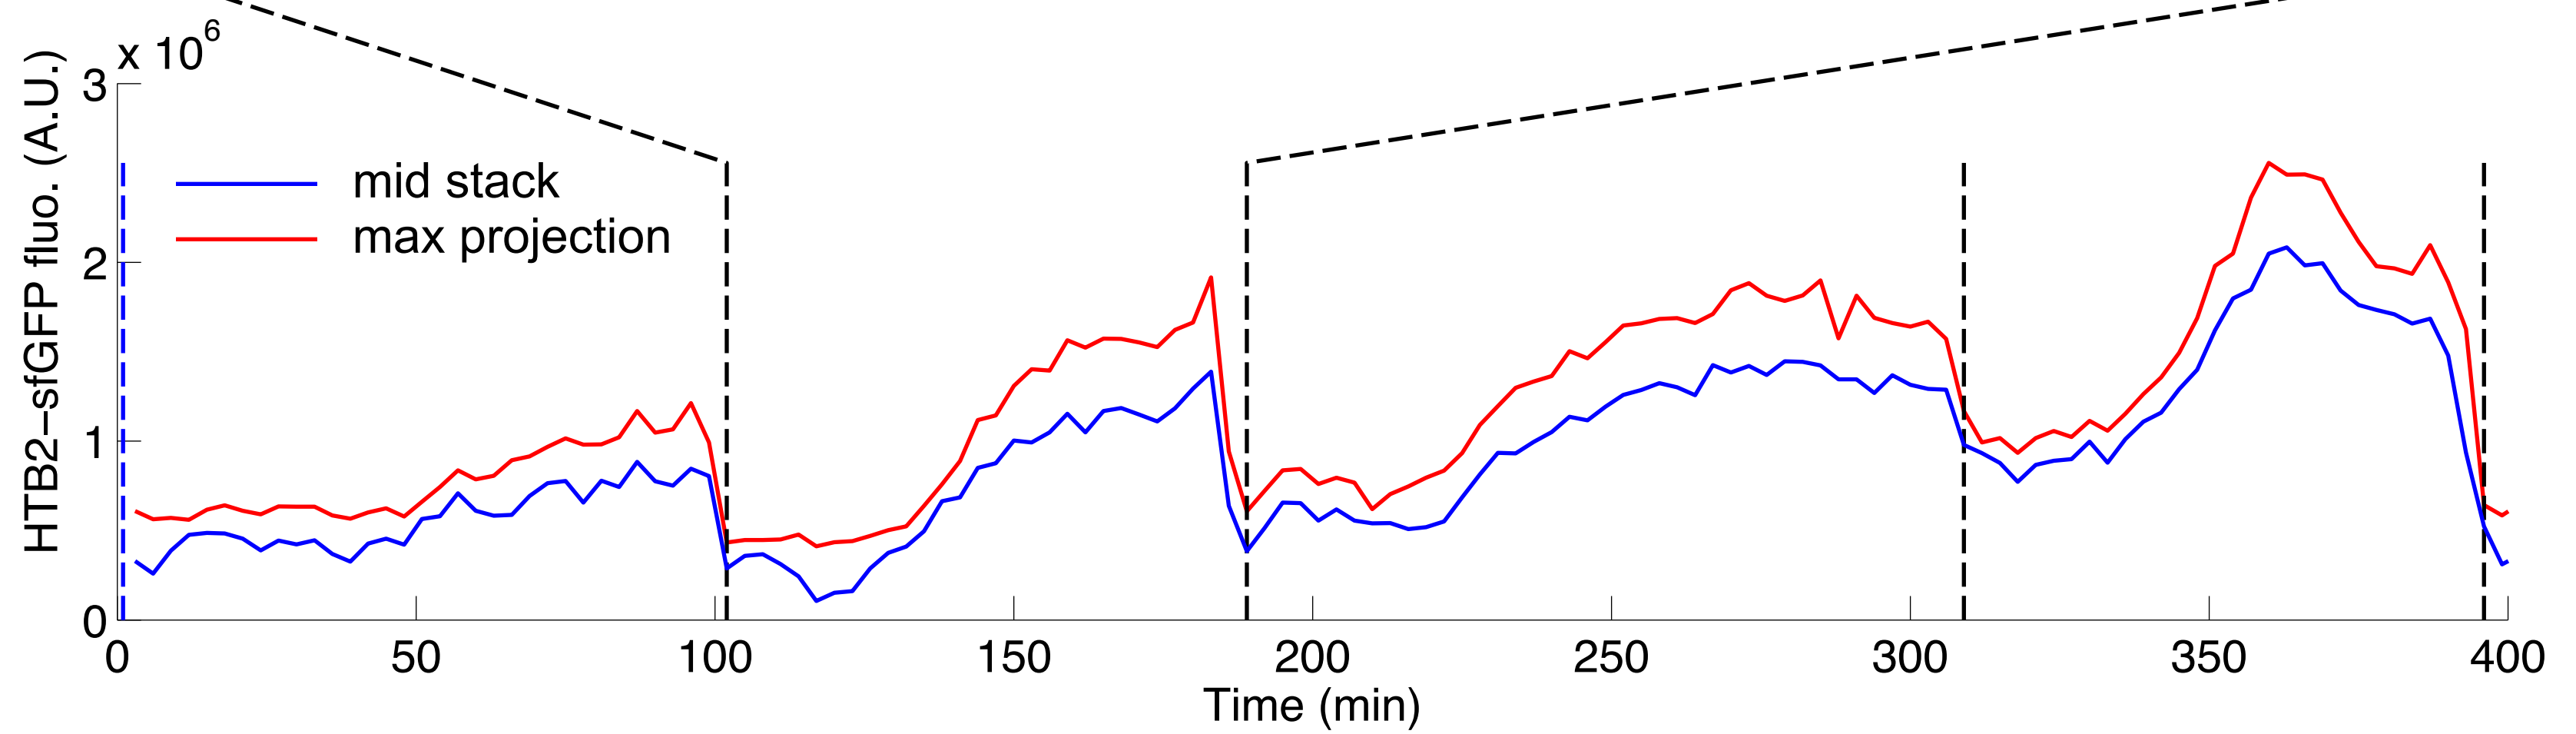

C

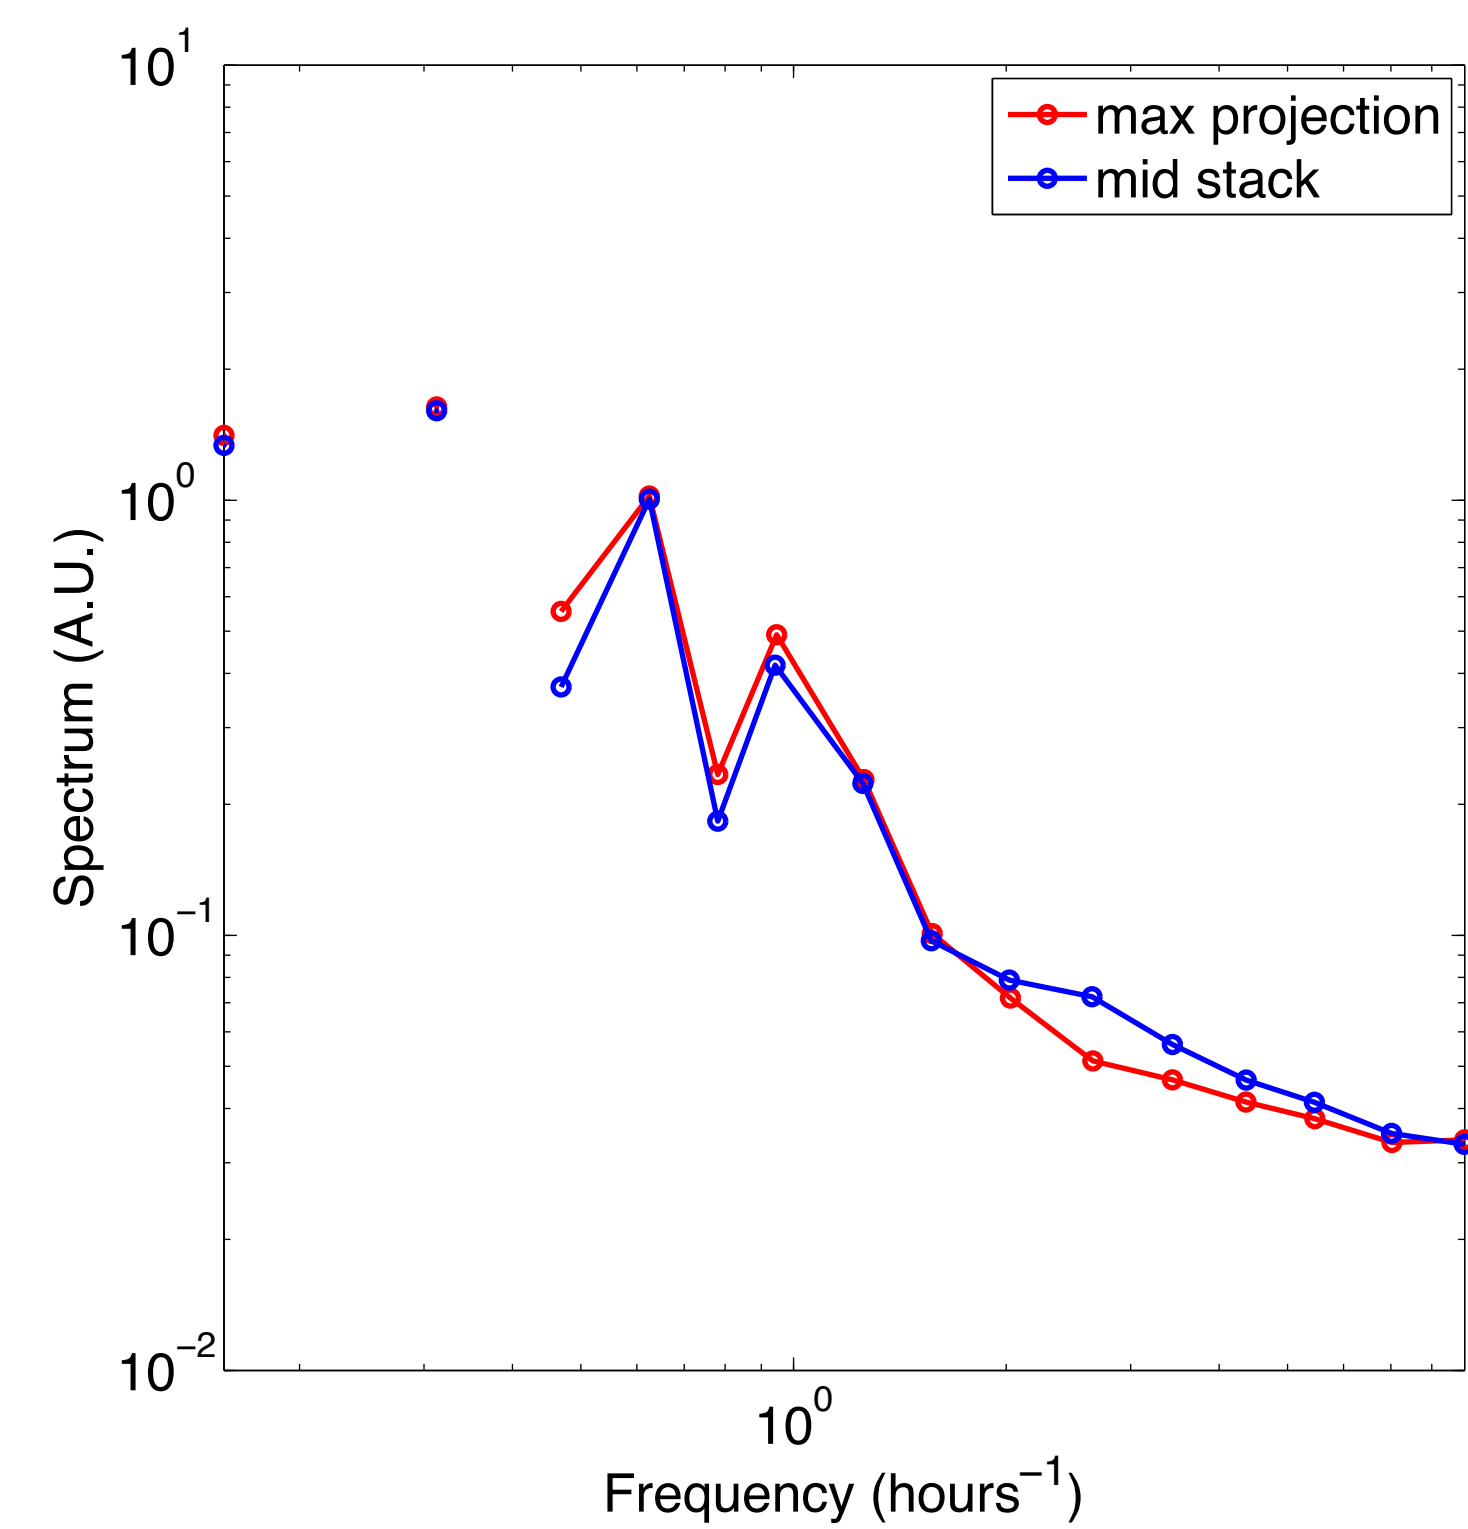

D

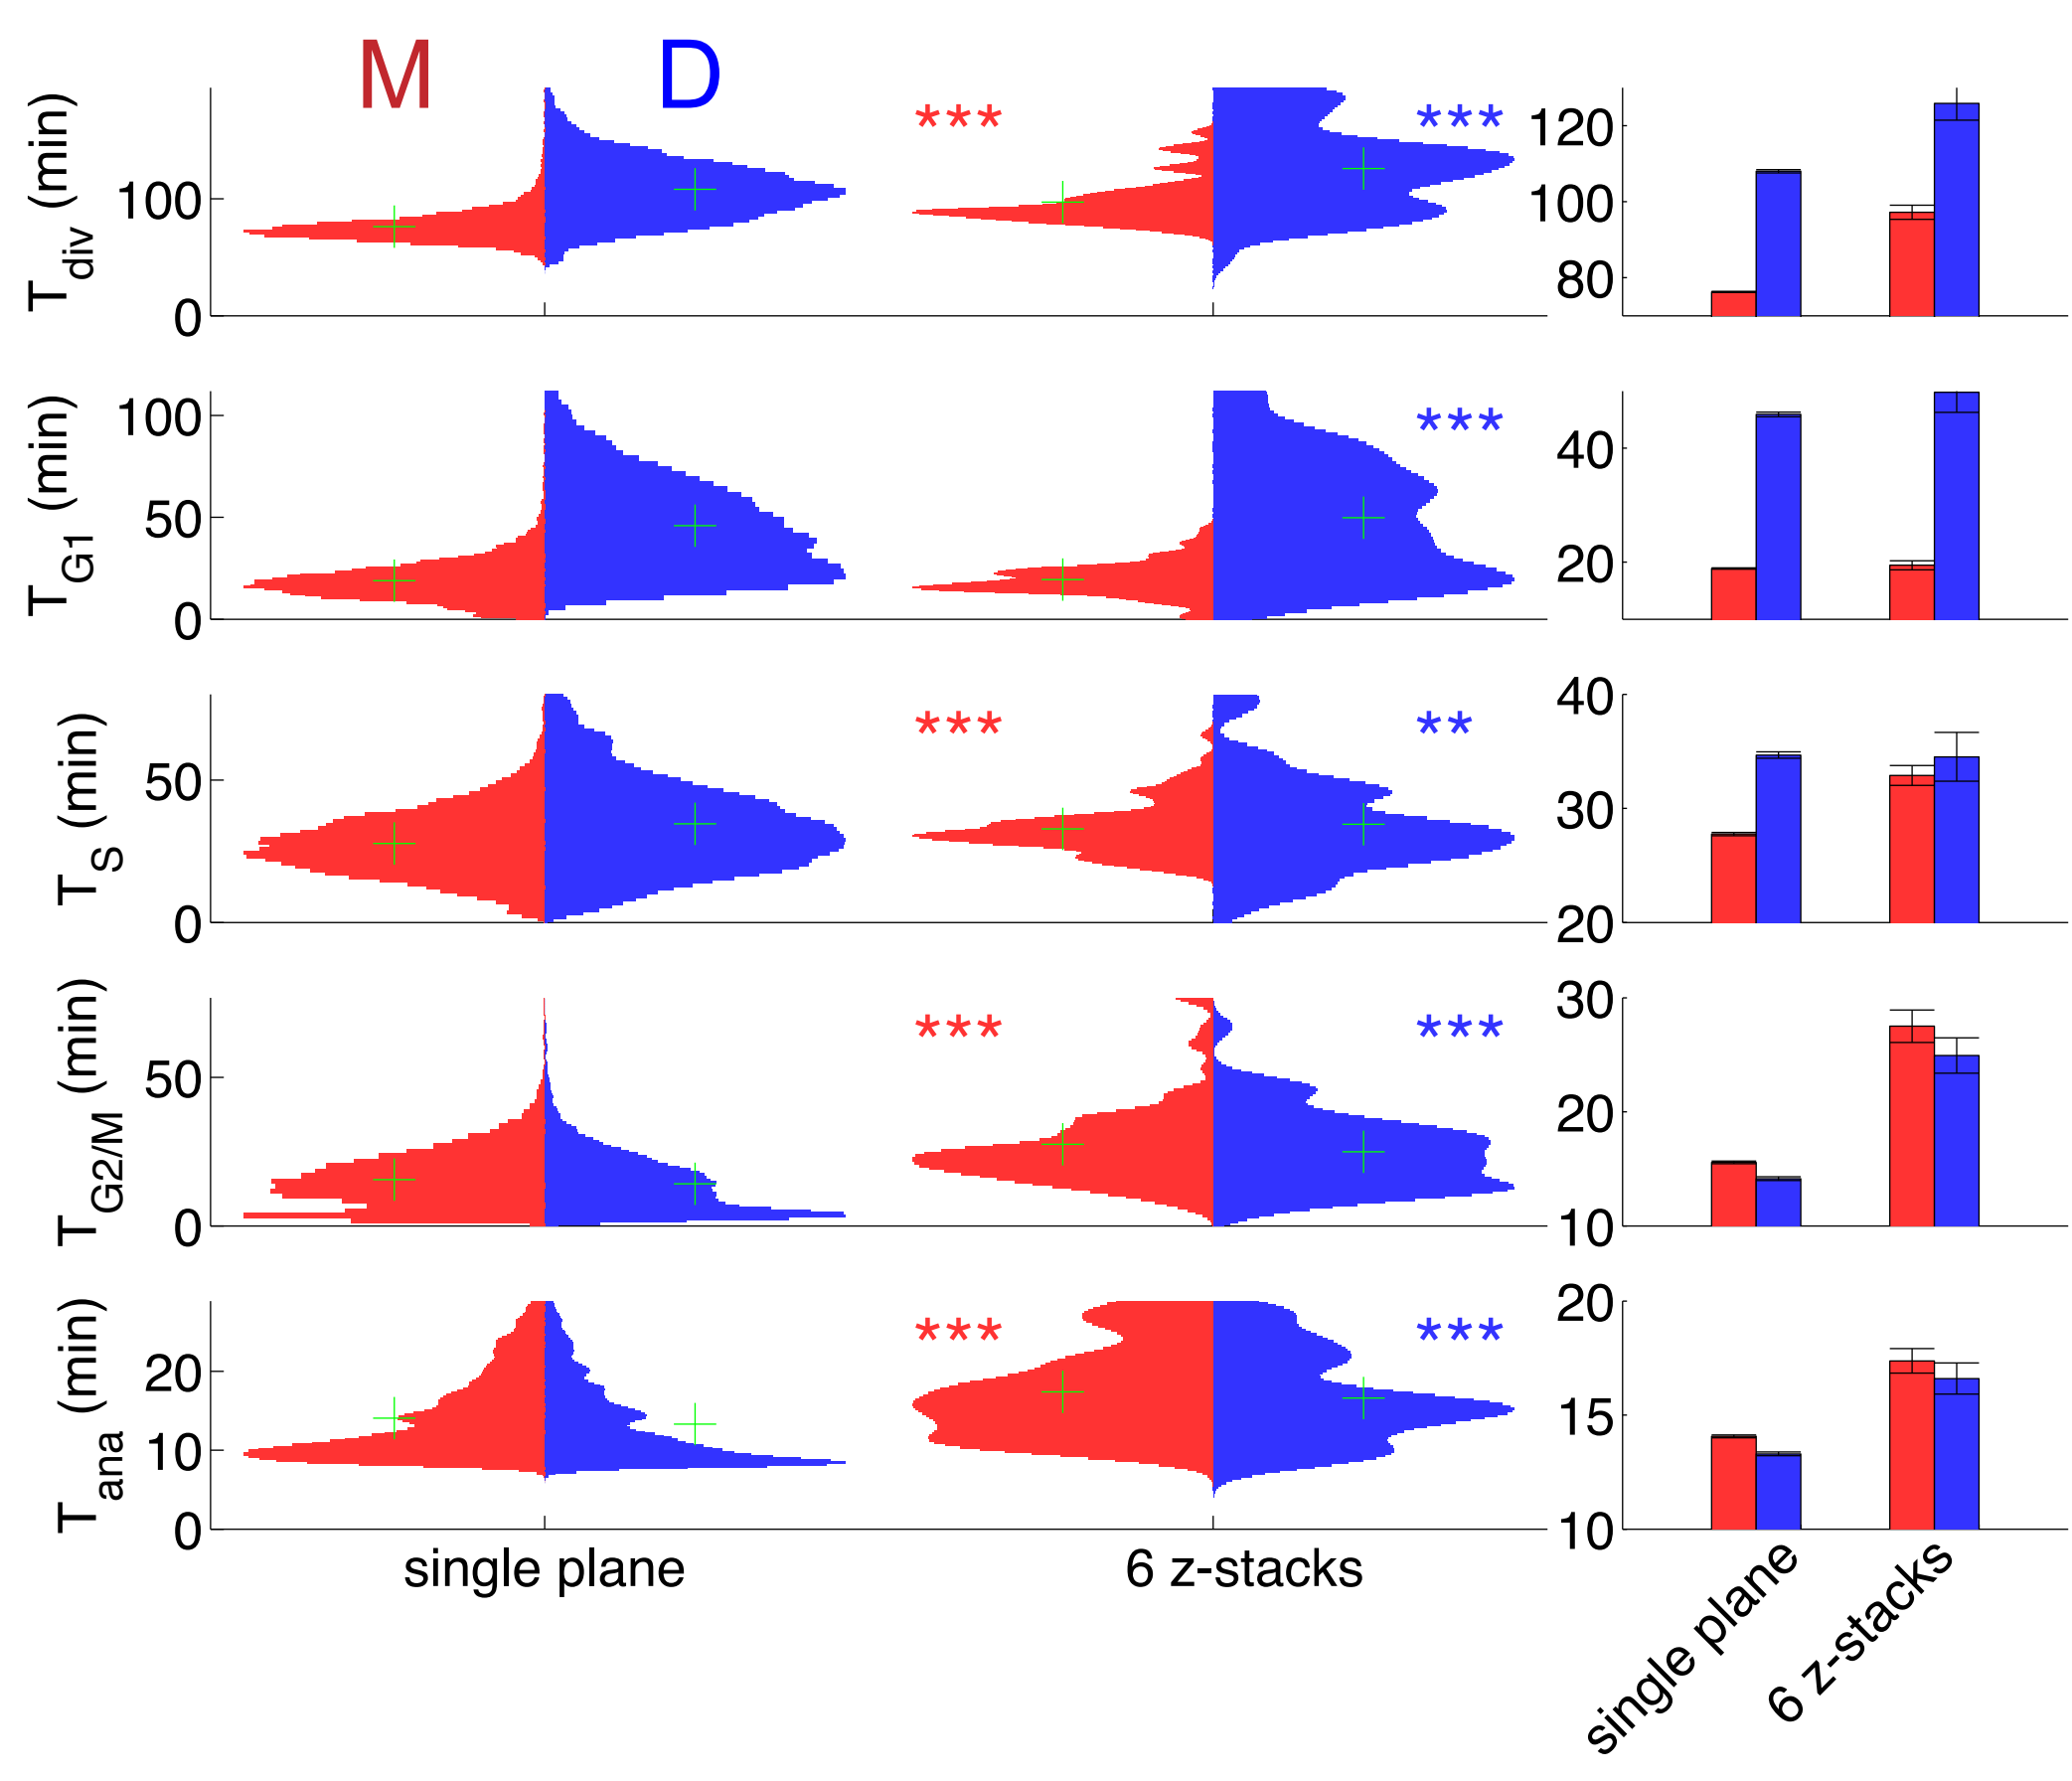

Supplement: supp [file elife-34025-supp-v1.zip › elife_poa_e34025_Figure_1_figure_supplement_8.pdf]
